# Supplementary material for: Chiral cyclometalated iridium complexes for asymmetric reduction reactions
Source: Royal Society of Chemistry journal article supplement (doi:10.1039/d0ob02049d), 2020-11-23
Supplement: d0ob02049d1.pdf [file d0ob02049d1.pdf]

## Supporting information

### Chiral Cyclometalated Iridium Complexes for Asymmetric Reduction Reactions

Jennifer Smith, Aysecik Kacmaz, Chao Wang, Barbara Villa-Marcos, Jianliang Xiao  
Department of Chemistry, University of Liverpool, Liverpool L69 7ZD, U.K

### Table of contents

|                                                               |           |
|---------------------------------------------------------------|-----------|
| <b>1. Experimental procedures.....</b>                        | <b>2</b>  |
| General Information                                           |           |
| General procedure for synthesis of oxazoline ligands          |           |
| General procedure for the synthesis of imidazoline ligands    |           |
| General procedure for preparation of cyclometalated complexes |           |
| Standard procedure for DARA under FT conditions               |           |
| Standard procedure for DARA under aqueous conditions          |           |
| ATH of pyridinium salt                                        |           |
| Optimisation of conditions for DARA with iridacycle <b>9</b>  |           |
| <b>2. Analytic data.....</b>                                  | <b>6</b>  |
| Analytic data for ligands and iridium complexes               |           |
| Analytic data for amine products                              |           |
| Analytic data for piperidine products                         |           |
| <b>3. Single crystal X-ray diffraction details.....</b>       | <b>26</b> |
| Crystallographic data of complex <b>1</b>                     |           |
| Crystallographic data of complex <b>2</b>                     |           |
| <b>4. References.....</b>                                     | <b>69</b> |

## 1. Experimental procedures

### General information

NMR spectra were recorded on a Bruker 400 MHz NMR spectrometer, with TMS as internal standard. HPLC analysis was recorded on an Agilent 1260 Infinity equipped with Chiralpak IB-3 or Chiralcel OJ-3 column. IPA, dichloromethane and toluene were dried on a MB-SPS 800. Methanol was dried over magnesium and iodine. 4Å MS were activated in an oven overnight. All other chemicals were obtained commercially and used without further purification.

### General procedure for synthesis of oxazoline ligands<sup>[1]</sup>

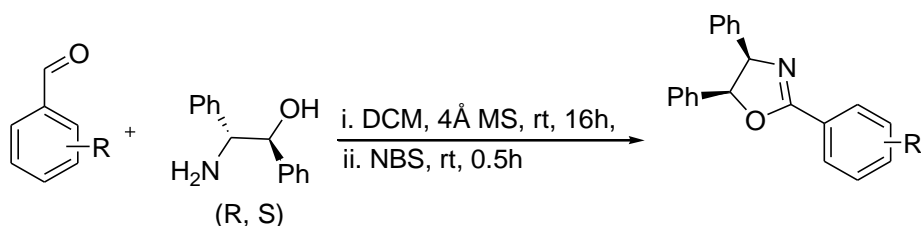

A round bottom flask was charged with amino alcohol (1 eq), benzaldehyde (1 eq, 1 mmol), 4Å MS and a stirrer bar. DCM (5 mL) was added and the reaction was stirred at room temperature for 16 h. NBS (1 eq) was added slowly to the flask, producing an orange/yellow solution, which was stirred for a further 30 min. The reaction mixture was filtered and washed with aq NaHCO<sub>3</sub> (10 mL x 3) and water (10 mL). The organics were dried over MgSO<sub>4</sub> and concentrated under vacuum. The resulting residue was purified by column chromatography in 10% EtOAc in hexane.

### General procedure for the synthesis of imidazoline ligands<sup>[2]</sup>

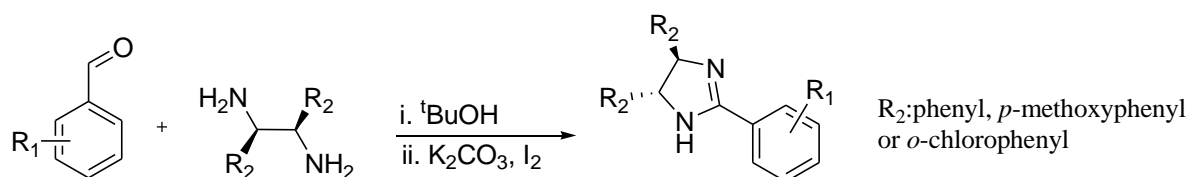

A reaction tube was charged with diamine (1 eq), benzaldehyde (1 eq, 1 mmol) and a stirrer bar. *t*BuOH (5 mL) was then added and the resulting mixture stirred at room temperature for 16 h. K<sub>2</sub>CO<sub>3</sub> (3 eq) and I<sub>2</sub> (1.25 eq) were then added and the resulting dark orange solution was heated to 70 °C and stirred for 3 h. Once cooled the reaction was quenched by addition of saturated aq Na<sub>2</sub>S<sub>2</sub>O<sub>4</sub> (10 mL) and the organics extracted with EtOAc. The organic layer was

washed with water (10 mL x 3) and dried over MgSO<sub>4</sub>. The solvent was then removed under vacuum and the residue purified by column chromatography in 50% EtOAc in hexane.

### General procedure for preparation of cyclometalated complexes<sup>[3, 4, 5]</sup>

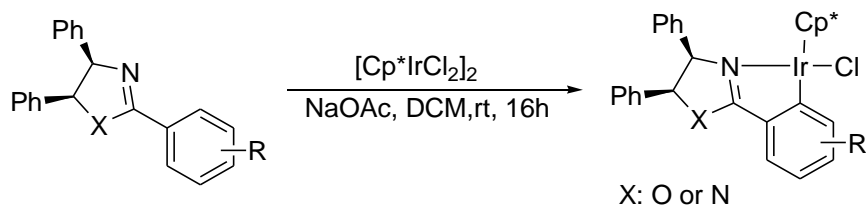

A glass vial was charged with [IrCp\*Cl<sub>2</sub>]<sub>2</sub> (1 eq), ligand (2 eq), NaOAc (10 eq) and a stirrer bar. Dichloromethane was added and the resulting solution was left to stir at room temperature for 16 h. The reaction mixture was filtered through Celite and the solvent was removed under vacuum. The complex was recrystallised from DCM/hexane to yield iridacycles.

Due to the steric bulk, complex **4** formation required harsher cyclometalation conditions, heating to 50 °C under a sealed nitrogen atmosphere.

### Standard procedure for DARA under FT conditions

A glass vial was charged with the iridium catalyst (1 mol%), amine (1.2 eq) and ketone (0.5 mmol) along with a stirring bar, IPA (2.5 mL) was added, followed by azeotropic formic acid-triethylamine (FT, 0.5 mL) to initiate the reaction. The glass vial was sealed and stirred at the stated temperature and time. After the reaction was complete, the reaction mixture was quenched by the addition of 1M NaOH and extracted into EtOAc. The organic phase was dried over MgSO<sub>4</sub>, filtered and evaporated under vacuum. The resulting residue was purified by column chromatography, in 15% EtOAc in hexane, upon which HPLC analysis was performed.

### Standard procedure for DARA under aqueous conditions

A glass vial was charged with the iridium catalyst (1 mol%), amine (1.2 eq) and ketone (0.5 mmol) along with a stirring bar. 2-MeTHF (0.3 mL) was added, followed by an aqueous solution of sodium formate/formic acid (3 mL) to initiate the reaction. The glass vial was sealed and stirred at the stated temperature and time. After the reaction was complete, the reaction mixture was quenched by the addition of saturated aq K<sub>2</sub>CO<sub>3</sub> and extracted into EtOAc. The organic phase was dried over MgSO<sub>4</sub>, filtered and evaporated under vacuum. The resulting residue was

purified by column chromatography, in 15% EtOAc in hexane, upon which HPLC analysis was performed.

#### **ATH of pyridinium salt**

To a Schlenk tube charged with a stirrer bar, the benzyl protected pyridine (0.5 mmol) and an iridium complex (1 mol%) were loaded, followed by IPA (5 mL). The Schlenk tube was inserted into an Integrity 10 machine, pre-set to -10 °C. FT (1 mL) was injected into the Schlenk tube and the reaction mixture left to stir for 16 h. The reaction was quenched by the addition of aq NaOH solution (5 mL); the reaction mixture was warmed to room temperature. The organics were extracted with EtOAc x 3, dried over MgSO<sub>4</sub> and concentrated under vacuum. The resulting residue was purified by column chromatography, using an eluent of 20% EtOAc in hexane, upon which HPLC analysis was performed.

## Optimisation of conditions for DARA with iridacycle 9\*

| Table S1. Optimisation Conditions for DARA with iridacycle 9 |            |                                                                       |                |           |           |
|--------------------------------------------------------------|------------|-----------------------------------------------------------------------|----------------|-----------|-----------|
|                                                              |            |                                                                       |                |           |           |
| Entry                                                        | Temp. (°C) | Solvent (mL/mL)                                                       | Additive       | conv. (%) | ee (%)    |
| 1                                                            | r.t        | IPA/FT (2.5/0.5)                                                      | -              | 78        | 56        |
| 2                                                            | r.t        | FT (1)                                                                | -              | 0         | 27        |
| 3                                                            | r.t        | IPA (2.5)                                                             | -              | 0         | -         |
| 4 <sup>[a]</sup>                                             | r.t        | PhMe/FT (2.5/0.5)                                                     | -              | 0         | -         |
| 5 <sup>[a]</sup>                                             | r.t        | MeCN (2.5/0.5)                                                        | -              | 0         | -         |
| 6 <sup>[a]</sup>                                             | r.t        | TFE (2.5/0.5)                                                         | -              | 25        | -         |
| 7 <sup>[a]</sup>                                             | r.t        | MeOH (2.5/0.5)                                                        | -              | 58        | 43        |
| 8 <sup>[a]</sup>                                             | r.t        | t-amyl alcohol (2.5/0.5)                                              | -              | 30        | 42        |
| 9 <sup>[a]</sup>                                             | r.t        | t-butanol (2.5/0.5)                                                   | -              | 42        | 50        |
| 10 <sup>[a]</sup>                                            | r.t        | PEG-200 (2.5/0.5)                                                     | -              | 57        | 53        |
| 11 <sup>[a]</sup>                                            | r.t        | PEG-300 (2.5/0.5)                                                     | -              | 53        | 51        |
| 12 <sup>[a]</sup>                                            | r.t        | PEG-400 (2.5/0.5)                                                     | -              | 47        | 50        |
| 13 <sup>[a]</sup>                                            | r.t        | ethylene glycol (2.5/0.5)                                             | -              | 80        | 44        |
| 14 <sup>[a]</sup>                                            | r.t        | ethylene glycol- IPA (1/1)                                            | -              | 73        | 48        |
| 15 <sup>[b]</sup>                                            | r.t        | IPA/FT (2.5/0.5)                                                      | 4Å MS (30 mg)  | 88        |           |
| 16 <sup>[b]</sup>                                            | r.t        | IPA/FT (2.5/0.5)                                                      | 4Å MS (60 mg)  | 84        |           |
| 17 <sup>[b]</sup>                                            | r.t        | IPA/FT (2.5/0.5)                                                      | 4Å MS (100 mg) | 62        |           |
| <b>18</b>                                                    | <b>23</b>  | <b>IPA/FT (2.5/0.5)</b>                                               | -              | <b>92</b> | <b>56</b> |
| 19                                                           | 15         | IPA/FT (2.5/0.5)                                                      | -              | 78        | 56        |
| 20                                                           | 5          | IPA/FT (2.5/0.5)                                                      | -              | 70        | 54        |
| 21                                                           | -10        | IPA/FT (2.5/0.5)                                                      | -              | 18        | 40        |
| 22 <sup>[c]</sup>                                            | 20         | H <sub>2</sub> O (pH 4.5) with NaCO <sub>2</sub> H/HCO <sub>2</sub> H | -              | 100       | 40        |
| 23 <sup>[d]</sup>                                            | 20         | IPA with Hantzsch ester                                               | -              | 0         | -         |
| 24 <sup>[d]</sup>                                            | 20         | PhMe with Hantzsch ester                                              | -              | 0         | -         |

Reaction conditions; 0.5 mmol acetophenone, 0.6 mmol p-methoxy aniline

<sup>[a]</sup> room temperature was determined to be between 8 and 15 °C,

<sup>[b]</sup> ee values did not investigated,

<sup>[c]</sup> NaCO<sub>2</sub>H/HCO<sub>2</sub>H was used as hydride source,

<sup>[d]</sup> Hantzsch ester was used as hydride source

Hantzsch ester

\*The configuration of the amine product is *R* based on comparison with the literature HPLC data (*J. Am. Chem. Soc.* **2009**,*131*, 6967). We assume the configuration of other amines to be the same.

## 2. Analytic data

### Analytic data for ligands and iridium complexes

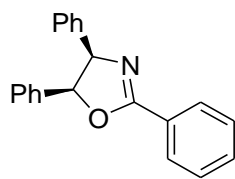

**(4*R*,5*S*)-2,4,5-Triphenyl-4,5-dihydrooxazole:**<sup>[6]</sup> White solid; **<sup>1</sup>H NMR**

(CDCl<sub>3</sub>, 400 MHz) δ (ppm) 8.19-8.17 (m, 2H), 7.59-7.55 (m, 1H), 7.52-7.48 (m, 2H), 7.09-7.00 (m, 6H), 6.99-6.92 (m, 4H), 6.02 (d, *J* = 10.0 Hz, 1H), 5.75 (d, *J* = 10.0 Hz, 1H); **<sup>13</sup>C NMR** (CDCl<sub>3</sub>, 100 MHz) δ (ppm): 165.3, 138.1, 137.0, 132.2, 129.0, 128.9, 128.3, 128.1, 128.0, 127.9, 127.8, 127.4, 126.8, 85.7, 74.9; **HRMS** (ESI) for C<sub>21</sub>H<sub>17</sub>NO [M+H]<sup>+</sup>: *m/z* calc: 300.1383. Found: 300.1383.

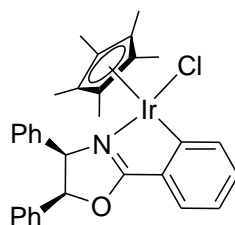

**Complex 1:** Orange crystals; A mixture of two isomers(2:1 ratio): **<sup>1</sup>H NMR**

(CDCl<sub>3</sub>, 400 MHz) δ (ppm) 7.86 (d, *J* = 7.6 Hz, 1H), 7.80 (d, *J* = 0.5 Hz), 7.65 (dd, *J* = 7.5, 1.4 Hz, 1H), 7.59 (dd, *J* = 7.4, 1.2 Hz, 0.5H), 7.40 (d, *J* = 6.6 Hz, 1H), 7.34-7.28 (m, 2H), 7.10-6.90 (m, 15H), 6.28 (d, *J* = 9.1 Hz, 1H), 6.23 (d, *J* = 10.0 Hz, 0.5H), 5.80 (d, *J* = 10.0 Hz, 0.5H), 5.42 (d, *J* = 9.1 Hz, 1H), 1.50 (s, 15H), 1.49 (s, 7.5H); **<sup>13</sup>C NMR** (CDCl<sub>3</sub>, 100 MHz) δ (ppm): 181.6, 179.8, 177.3, 174.6, 163.8, 163.3, 162.4, 162.1, 158.8, 136.2, 135.8, 134.7, 132.8, 128.5, 128.4, 128.3, 128.2, 128.0, 127.5, 127.3, 126.7, 88.7, 88.0, 83.6, 77.6, 76.4, 72.5, 9.77, 9.54; **HRMS** (ESI) for C<sub>31</sub>H<sub>31</sub>IrNO [M-Cl]<sup>+</sup>: *m/z* calc: 626.2035. Found: 626.2042; **CHN** calculated: C 56.31, H 4.73, N 2.12. Found: C 56.38, H 4.69, N 2.14; Single crystal suitable for X-ray diffraction experiment was obtained by diffusion hexane into a solution of **1** in CH<sub>2</sub>Cl<sub>2</sub>.

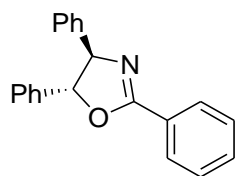

**(4*R*,5*R*)-2,4,5-Triphenyl-4,5-dihydrooxazole:**<sup>[7]</sup> **<sup>1</sup>H NMR** (CDCl<sub>3</sub>, 400

MHz) δ (ppm) 8.15-8.13 (m, 2H), 7.56-7.29 (m, 13H), 5.41 (d, *J* = 7.7 Hz, 1H), 5.22 (d, *J* = 7.6 Hz, 1H); **<sup>13</sup>C NMR** (CDCl<sub>3</sub>, 100 MHz) δ (ppm): 164.5, 142.2, 140.9, 132.1, 129.4, 129.3, 129.1,

128.9, 128.8, 128.2, 127.9, 127.2, 126.1, 89.4, 79.5; **HRMS** (ESI) for  $C_{21}H_{17}NO$   $[M+H]^+$ :  $m/z$  calc: 300.1383. Found: 300.1385; **CHN** calculated: C 84.25, H 5.72, N 4.58. Found: C 84.60, H 5.77, N 4.61.

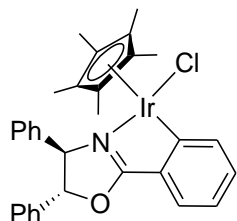

**Complex 2:** Orange crystals; A mixture of two isomers (1:1 ratio);  **$^1H$  NMR** ( $CDCl_3$ , 400 MHz)  $\delta$  (ppm) 7.85 (d,  $J = 7.7$  Hz, 1H), 7.81 (d,  $J = 7.6$  Hz, 1H), 7.59-7.54 (m, 4H), 7.46-7.27 (m, 20H), 7.08-7.03 (m, 2H), 5.54 (d,  $J = 7.0$  Hz, 1H), 5.52 (d,  $J = 10.4$  Hz, 1H), 5.18 (d,  $J = 7.0$  Hz, 1H), 5.15 (d,  $J = 10.4$  Hz, 1H), 1.51 (s, 15H), 1.46 (s, 15H). Single crystal suitable for X-ray diffraction experiment was obtained by diffusion hexane into a solution of **2** in  $CH_2Cl_2$ .

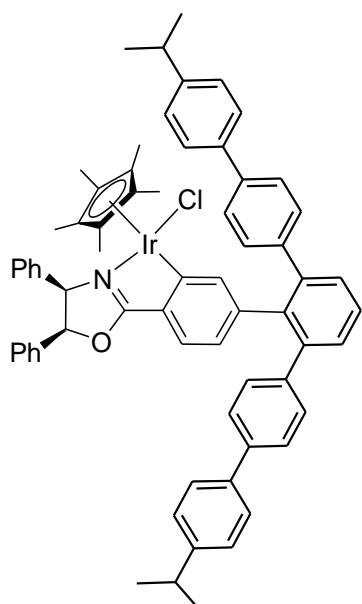

**Complex 3:** Yellow solid; A mixture of two isomers (2.3:1 ratio);  **$^1H$  NMR** ( $CDCl_3$ , 400 MHz)  $\delta$  (ppm) 7.91-7.79 (m, 2H), 7.72-7.58 (m, 4H), 7.52-7.47 (m, 2H), 7.44-7.40 (m, 2H), 7.31-7.28 (m, 3H), 7.10-08 (m, 8H), 7.06- 7.01 (m, 7H), 6.98-6.94 (m, 2H), 6.89 (bs, 2H), 6.28 (d,  $J = 9.1$  Hz, 0.7H), 6.23 (d,  $J = 10.0$  Hz, 0.3H), 5.80 (d,  $J = 10.0$  Hz, 0.3H), 5.41 (d,  $J = 9.1$  Hz, 0.7H), 1.75-1.68 (m, 2H), 1.52-1.47 (m, 23H), 1.39-1.37 (m, 4H);  **$^{13}C$  NMR** ( $CDCl_3$ , 100 MHz)  $\delta$  (ppm) 181.2, 136.1, 135.7, 135.4, 134.8, 134.7, 134.3, 133.2, 132.4, 131.5, 129.6, 128.6, 128.5, 128.4, 128.2, 128.1, 128.0, 127.9, 127.8, 127.8, 127.6, 127.4,

127.3, 127.1, 126.9, 126.7, 126.3, 125.7, 125.6, 122.0, 121.9, 90.7, 88.4, 88.1, 87.7, 73.3, 72.0, 31.4, 9.5, 9.4, 9.3, 9.2; **MS** (ESI) for  $C_{67}H_{63}ClIrNO$   $[M+H]^+$ :  $m/z$  calc: 1126.4. Found: 1126.4.

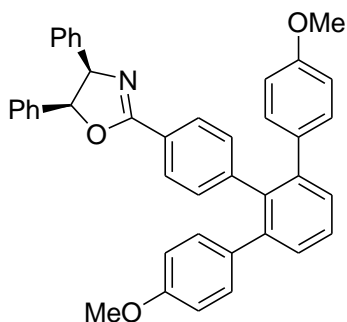

**(4R,5S)-2-(4''-Methoxy-6'-(4-methoxyphenyl)-[1,1':2',1''-terphenyl]-4-yl)-4,5-diphenyl-4,5-dihydrooxazole:** Yellow solid;  $^1H$  NMR ( $CDCl_3$ , 400 MHz)  $\delta$  (ppm) 7.84-7.82 (m, 2H), 7.52-7.43 (m, 4H), 7.10-6.96 (m, 15H), 6.79-6.76 (m, 4H), 5.99 (d,  $J = 10.1$  Hz, 1H), 5.72 (d,  $J = 10.1$  Hz, 1H), 3.81 (s, 6H);  $^{13}C$  NMR ( $CDCl_3$ , 100 MHz)  $\delta$  (ppm) 182.8, 165.1, 162.1, 158.2, 144.0, 141.5, 137.8, 136.6, 134.1, 131.9, 131.0, 129.5, 127.9, 127.7, 127.6, 127.5, 127.4, 127.0, 126.4, 124.7, 113.3, 85.2, 74.4, 55.2; **HRMS** (ESI) for  $C_{41}H_{33}NO_3$   $[M+H]^+$ :  $m/z$  calc: 588.2533. Found: 588.2545.

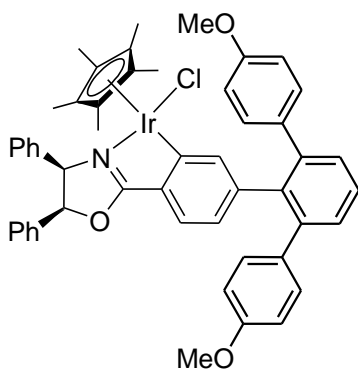

**Complex 4:** Yellow solid; A mixture of two isomers (2:1 ratio):  $^1H$  NMR ( $CDCl_3$ , 400 MHz)  $\delta$  (ppm) 7.50-7.41 (m, 4.5H), 7.39 (dd,  $J = 6.7, 1.1$  Hz, 2H), 7.31 (d,  $J = 7.7$  Hz, 1H), 7.25-7.18 (m, 3H), 7.14-6.97 (m, 15H), 6.94-6.84 (m, 3H), 6.82-6.69 (m, 6H), 6.62 (dd,  $J = 7.8, 1.4$  Hz, 1H), 6.59 (dd,  $J = 7.8, 1.4$  Hz, 0.5H), 6.26 (d,  $J = 9.3$  Hz, 1H), 6.15 (d,  $J = 9.9$  Hz, 0.5H), 5.75 (d,  $J = 9.9$  Hz, 0.5H), 5.37 (d,  $J = 9.3$  Hz, 1H), 3.78 (s, 3H), 3.77 (s, 1.5H), 3.76 (s, 3H), 3.75 (s, 1.5H), 1.25 (s, 15H), 1.24 (s, 7.5H);  $^{13}C$  NMR ( $CDCl_3$ , 100 MHz)  $\delta$  (ppm) 181.8, 181.1, 162.1, 158.1, 158.0, 157.9, 145.0, 143.8, 142.2, 140.9, 140.5, 140.0, 139.7, 139.4, 139.2, 126.4, 135.1, 134.8, 134.5, 133.8, 131.3, 131.1, 130.9, 129.4, 129.3, 129.3, 129.2, 129.1, 128.3, 128.2, 128.1, 127.9, 127.8, 127.8, 127.6, 127.4, 126.9, 126.3, 126.0,



125.8, 125.7, 125.4, 113.5, 113.3, 113.2, 90.5, 88.0, 87.2, 73.1, 72.0, 55.3, 55.3, 55.3, 55.2, 9.2, 8.9; **MS** (ESI) for  $C_{51}H_{47}ClIrNO_3$   $[M+H]^+$ :  $m/z$  calc: 950.3. Found: 950.4; **CHN** calculated: C 64.51, H 4.99, N 1.48. Found: C 64.00, H 4.96, N 1.33.

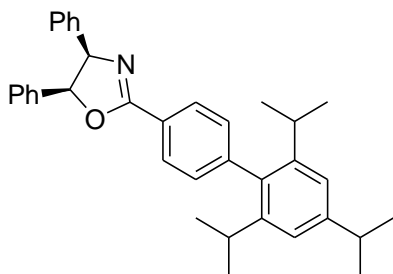

**(4*R*,5*S*)-4,5-Diphenyl-2-(2',4',6'-triisopropyl-[1,1'-biphenyl]-4-yl)-4,5-dihydrooxazole:**<sup>[81]</sup> White solid; **<sup>1</sup>H NMR** ( $CDCl_3$ , 400 MHz)  $\delta$  (ppm) 8.20 (d,  $J = 8.1$  Hz, 2H), 7.33 (d,  $J = 9.2$  Hz, 2H), 7.08-6.97 (m, 12H), 6.05 (d,  $J = 10.1$  Hz, 1H), 5.78 (d,  $J = 10.1$  Hz, 1H), 2.95 (septet,  $J = 6.9$  Hz, 1H), 2.63 (septet,  $J = 6.9$  Hz, 2H), 1.32 (d,  $J = 6.9$  Hz, 6H), 1.11 (d,  $J = 6.9$  Hz, 12H). **<sup>13</sup>C NMR** ( $CDCl_3$ , 100 MHz)  $\delta$  (ppm) 165.0, 148.3, 146.3, 145.0, 137.8, 136.7, 136.2, 130.2, 128.3, 128.0, 127.7, 127.7, 127.4, 127.0, 126.4, 125.7, 120.7, 85.4, 74.6, 23.3, 30.4, 24.2, 24.1. **HRMS** (ESI) for  $C_{36}H_{39}NO$   $[M+H]^+$ :  $m/z$  calc: 502.3104. Found: 502.3109.

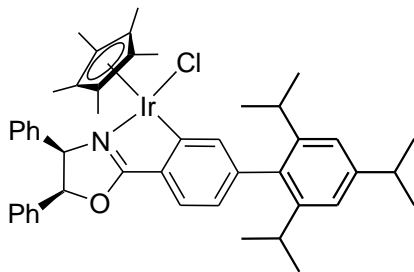

**Complex 5:**<sup>[81]</sup> Yellow solid; A mixture of two isomers (2.3:1 ratio); **<sup>1</sup>H NMR** ( $CDCl_3$ , 400 MHz)  $\delta$  (ppm) 7.68 (d,  $J = 7.7$  Hz, 0.7H), 7.62 (s, 0.7H), 7.58 (d,  $J = 7.7$  Hz, 0.3H), 7.56 (s, 0.3H), 7.42 (d,  $J = 7.2$  Hz, 0.7H), 7.35 (d,  $J = 7.2$  Hz, 0.3H), 7.12-7.02 (m, 11H), 6.90 (d,  $J = 7.7$  Hz, 0.7H), 6.87 (d,  $J = 7.7$  Hz, 0.3H), 6.30 (d,  $J = 9.2$  Hz, 0.7H), 6.27 (d,  $J = 10.4$  Hz, 0.3H), 5.80 (d,  $J = 10.4$  Hz, 0.3H), 5.47 (d,  $J = 9.2$  Hz, 0.7H), 3.03-2.69 (m, 3H), 1.58 (s, 3H), 1.50 (s, 12H), 1.36 (d,  $J = 6.8$  Hz, 6H), 1.20-1.09 (m, 12H); **<sup>13</sup>C NMR** ( $CDCl_3$ , 100 MHz)  $\delta$  (ppm) 181.1, 163.2, 147.5, 145.9, 137.8, 137.3, 136.2, 134.4, 128.1, 128.0, 127.8, 126.3, 123.7, 120.7, 120.2, 90.7, 88.2, 87.5, 72.1, 34.2, 30.5, 30.2, 25.0, 24.6, 24.0, 23.9, 9.4, 9.1; **CHN** calculated: C 63.98, H 6.19, N 1.62. Found: C 63.78, H 6.27, N 1.45.

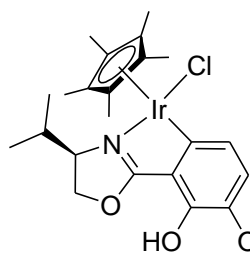

**Complex 6:** Yellow solid;  $^1\text{H NMR}$  ( $\text{CDCl}_3$ , 400 MHz)  $\delta$  (ppm) 7.14 (d,  $J = 8.2$  Hz, 1H), 6.76 (d,  $J = 7.1$  Hz, 1H), 4.49-4.36 (m, 1H), 4.36-4.16 (m, 2H), 3.78 (s, 3H), 2.76-2.58 (m, 1H), 1.58 (s, 15H), 0.92 (d,  $J = 7.1$  Hz, 3H), 0.84 (d,  $J = 6.2$  Hz, 3H).  $^{13}\text{C NMR}$  ( $\text{CDCl}_3$ , 100 MHz)  $\delta$  (ppm) 159.5, 152.9, 120.8, 114.9, 113.2, 109.7, 84.5, 73.9, 87.9, 56.5, 29.6, 19.5, 9.2, 9.0. **MS** (ESI) for  $\text{C}_{23}\text{H}_{31}\text{ClIrNO}_3$   $[\text{M}]^+$ : 597.2. Found: 597.3. **CHN** calculated: C 46.26, H 5.23, N 2.35. Found: C 45.46, H 5.27, N 1.69.

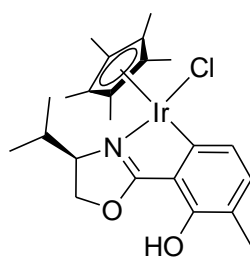

**Complex 7:** Yellow solid;  $^1\text{H NMR}$  ( $\text{CDCl}_3$ , 400 MHz)  $\delta$  (ppm) 7.38 (d,  $J = 7.0$  Hz, 1H), 7.12 (d,  $J = 7.0$  Hz, 1H), 4.46-4.43 (m, 1H), 4.30-4.19 (m, 2H), 2.68-2.56 (m, 1H), 2.93 (s, 3H), 1.61 (s, 15H), 0.91 (dd,  $J = 24.1, 7.7$  Hz, 6H);  $^{13}\text{C NMR}$  ( $\text{CDCl}_3$ , 100 MHz)  $\delta$  (ppm) 160.8, 133.6, 131.0, 126.5, 113.4, 108.2, 84.3, 74.2, 67.4, 29.7, 19.5, 17.8, 14.8, 9.0; **MS** (ESI) for  $\text{C}_{23}\text{H}_{31}\text{ClIrNO}_2$   $[\text{M}+\text{H}]^+$ :  $m/z$  calc: 582.2. Found: 582.5; **CHN** calculated: C 47.53, H 5.38, N 2.41. Found: C 45.92, H 5.38, N 1.82.

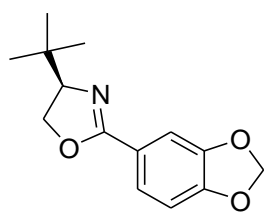

**(R)-2-(Benzo[d][1,3]dioxol-5-yl)-4-(tert-butyl)-4,5-dihydrooxazole:**

White solid;  $^1\text{H NMR}$  ( $\text{CDCl}_3$ , 400 MHz)  $\delta$  (ppm) 7.50 (d,  $J = 8.0$  Hz, 1H), 7.43 (s, 1H), 6.81 (d,  $J = 8.0$  Hz, 1H), 6.00 (s, 2H), 4.33-4.28 (m, 1H), 4.20 (t,  $J = 8.1$  Hz, 1H), 4.01 (dd,  $J = 10, 7.6$  Hz, 1H), 0.94 (s, 9H);  $^{13}\text{C NMR}$  ( $\text{CDCl}_3$ , 100 MHz)  $\delta$  (ppm) 162.7, 150.0, 147.5, 123.0, 121.9, 108.5, 107.9, 101.4, 76.0, 68.7, 34.0, 25.8; **HRMS** (ESI) for  $\text{C}_{14}\text{H}_{17}\text{NO}_3$   $[\text{M}+\text{H}]^+$ :  $m/z$  calc: 248.1281. Found: 248.1285; **CHN** calculated: C 68.00, H 6.93, N 5.66. Found: C 67.43, H 6.87, N 5.55.

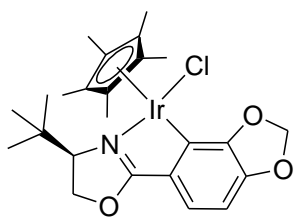

**Complex 8:** Yellow solid;  $^1\text{H NMR}$  ( $\text{CDCl}_3$ , 400 MHz)  $\delta$  (ppm) 7.05 (d,  $J = 7.9$  Hz, 1H), 6.53 (d,  $J = 7.9$  Hz, 1H), 6.02 (d,  $J = 1.5$  Hz, 1H), 5.97 (d,  $J = 1.5$  Hz, 1H), 4.77 (dd,  $J = 9.2, 4.0$  Hz, 1H), 4.55 (t,  $J = 8.8$  Hz, 1H), 3.96 (dd,  $J = 9.4, 4.0$  Hz, 1H), 1.75 (s, 15H), 1.09 (s, 9H);  $^{13}\text{C NMR}$  ( $\text{CDCl}_3$ , 100 MHz)  $\delta$  (ppm) 179.5, 162.1, 150.7, 149.5, 141.4, 138.9, 124.9, 122.8, 103.3, 100.0, 99.4, 87.8, 72.3, 70.9, 58.6, 35.8, 25.7, 9.6; **MS** (ESI) for  $\text{C}_{24}\text{H}_{31}\text{ClIrNO}_3$   $[\text{M}]^+$ :  $m/z$  calc: 609.2. Found: 609.3; **CHN** calculated: C 47.32, H 5.18, N 2.30. Found: C 46.26, H 5.06, N 1.72.

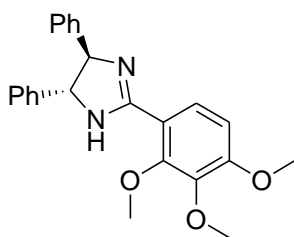

**(4*R*,5*R*)-4,5-Diphenyl-2-(2,3,4-trimethoxyphenyl)-4,5-dihydro-1*H*-imidazole:** Yellow solid;  $^1\text{H NMR}$  ( $\text{CDCl}_3$ , 400 MHz)  $\delta$  (ppm) 8.04 (d,  $J = 8.9$  Hz, 1H), 7.36-7.25 (m, 11H  $\text{CDCl}_3$  included), 6.78 (d,  $J = 8.9$  Hz, 1H), 4.86 (s, 2H), 3.97 (s, 3H), 3.91 (s, 3H), 3.89 (s, 3H);  $^{13}\text{C NMR}$  ( $\text{CDCl}_3$ , 100 MHz)  $\delta$  (ppm) 161.6, 155.9, 152.9, 144.0, 142.0, 128.7, 127.4, 126.6, 126.1, 116.1, 107.9, 61.8, 61.0, 56.2; **HRMS** (ESI) for  $\text{C}_{24}\text{H}_{24}\text{N}_2\text{O}_3$   $[\text{M}+\text{H}]^+$ :  $m/z$  calc: 389.1860. Found: 389.1868.

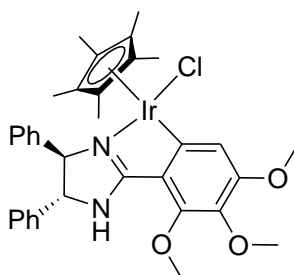

**Complex 9:** Yellow solid; A mixture of two isomer (2:1 ratio);  $^1\text{H NMR}$  ( $\text{CDCl}_3$ , 400 MHz)  $\delta$  (ppm) 7.51 (d,  $J = 6.9$  Hz, 1H), 7.41-7.28 (m, 9H, including  $\text{CDCl}_3$ ), 7.1 (m, 1H), 6.61 (s, 1H), 4.97 (d,  $J = 6.0$  Hz, 0.33H), 4.92-4.84 (m, 1.32H), 4.71 (d,  $J = 6.0$  Hz, 0.33H), 4.04 (s, 2H), 4.01 (s, 1H), 4.00 (s, 2H), 3.99 (s, 1H), 3.83 (s, 1H), 3.79 (s, 2H), 1.46 (s, 10H), 1.44 (s, 5H);  $^{13}\text{C NMR}$  ( $\text{CDCl}_3$ , 100 MHz)  $\delta$  (ppm) 176.7, 175.7, 161.4, 160.2, 156.7, 156.2, 151.5, 151.4, 144.1, 142.4, 140.4, 139.7, 136.0, 135.8, 128.9, 128.7, 128.3, 128.2, 128.1,

128.0, 127.5, 127.3, 120.1, 118.9, 113.9, 113.4, 87.6, 87.1, 78.5, 78.0, 72.3, 72.1, 61.2, 61.1, 60.4, 55.8, 9.5, 9.2; **HRMS** (ESI) for  $C_{34}H_{38}ClIrN_2O_3$   $[M]^+$ :  $m/z$  calc: 750.2200. Found: 750.2206; **CHN** calculated: C 54.42, H 5.10, N 3.73. Found: C 53.92, H 5.34, N 3.33.

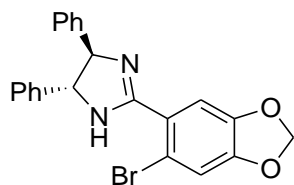

**(4*R*,5*R*)-2-(6-Bromobenzo[*d*][1,3]dioxol-5-yl)-4,5-diphenyl-4,5-**

**dihydro-1*H*-imidazole:** Yellow solid;  $^1\text{H NMR}$  ( $\text{CDCl}_3$ , 400 MHz)  $\delta$  (ppm) 7.35-7.26 (m, 11H plus  $\text{CHCl}_3$ ), 7.01 (s, 1H), 5.99 (s, 1H), 4.82 (s, 2H);  $^{13}\text{C NMR}$  ( $\text{CDCl}_3$ , 100 MHz)  $\delta$  (ppm) 162.8, 149.8, 147.4, 143.3, 128.7, 127.5, 126.8, 125.7, 113.3, 111.1, 102.3, 75.3; **HRMS** (ESI) for  $C_{22}H_{17}BrN_2O_2$   $[M+H]^+$ :  $m/z$  calc: 421.0552 and 423.0531. Found: 421.0546 and 423.0529; **CHN** calculated: C 62.72, H 4.07, N 6.65. Found: C 63.17, H 4.06, N 6.71.

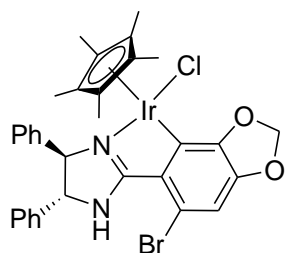

**Complex 10:** Yellow solid; A mixture of two isomers (2:1 ratio);  $^1\text{H}$

**NMR** ( $\text{CDCl}_3$ , 400 MHz)  $\delta$  (ppm) 7.47-7.40 (m, 8H), 7.34-7.30 (m, 7H), 6.78 (s, 0.5H), 6.76 (s, 1H), 6.13 (s, 1H), 6.01 (s, 1H), 5.98 (s, 1H), 5.01 (d,  $J = 5.6$  Hz, 0.5H), 4.93-4.86 (m, 2H), 4.70 (d,  $J = 5.6$  Hz, 0.5H), 1.51 (s, 15H), 1.47 (s, 7.5H);  $^{13}\text{C NMR}$  ( $\text{CDCl}_3$ , 100 MHz)  $\delta$  (ppm) 175.8, 175.0, 151.3, 150.9, 148.7, 148.1, 144.1, 143.7, 141.8, 140.4, 139.4, 129.0, 128.9, 128.5, 128.4, 128.4, 128.2, 128.1, 128.0, 127.6, 127.3, 127.2, 126.6, 113.7, 113.4, 108.8, 108.7, 100.2, 99.9, 88.9, 88.3, 79.1, 78.2, 72.1, 71.2, 9.8, 9.5; **HRMS** (ESI) for  $C_{32}H_{31}BrClIrN_2O_2$   $[M]^+$ :  $m/z$  calc: 782.0881. Found: 782.0875; **CHN** calculated: C 49.07, H 3.99, N 3.58. Found: C 48.58, H 4.10, N 3.54.

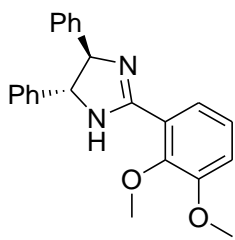

**(4*R*,5*R*)-2-(2,3-Dimethoxyphenyl)-4,5-diphenyl-4,5-dihydro-1*H*-imidazole:** Yellow oil;  $^1\text{H NMR}$  ( $\text{CDCl}_3$ , 400 MHz)  $\delta$  (ppm) 7.85 (dd,  $J = 8.1, 1.5$  Hz, 1H), 7.37-7.28 (m, 10H), 7.15 (t,  $J = 7.5$  Hz, 1H), 7.05 (dd,  $J = 8.1, 1.5$  Hz, 1H), 4.89 (s, 2H), 3.92 (s, 3H), 3.91 (s, 3H);  $^{13}\text{C NMR}$  ( $\text{CDCl}_3$ , 100 MHz)  $\delta$  (ppm) 161.9, 152.9, 148.1, 143.9, 128.7, 126.6, 124.5, 123.6, 122.7, 114.7, 61.6, 56.0; **HRMS** (ESI) for  $\text{C}_{23}\text{H}_{22}\text{N}_2\text{O}_2$   $[\text{M}+\text{H}]^+$   $m/z$  calc: 359.1754. Found: 359.1750.

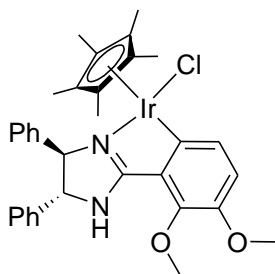

**Complex 11:** Yellow solid; A mixture of two isomers (2:1 ratio);  $^1\text{H NMR}$  ( $\text{CDCl}_3$ , 400 MHz)  $\delta$  (ppm) 7.52 (d,  $J = 6.8$  Hz, 2H), 7.48-7.27(m, 13H), 7.00 (t,  $J = 8.1$  Hz, 1.5H), 6.78 (s, 1H), 6.73 (s, 0.5H), 4.99 (d,  $J = 6.1$  Hz, 0.5H) 4.96-4.86 (m, 2H), 4.74 (d,  $J = 6.1$  Hz, 0.5H), 3.98 (s, 3H), 3.96 (s, 1.5H), 3.86 (s, 1.5H), 3.85 (s, 3H), 1.45 (s, 15H), 1.43 (s, 7.5H);  $^{13}\text{C NMR}$  ( $\text{CDCl}_3$ , 100 MHz)  $\delta$  (ppm) 176.8, 175.9, 155.9, 147.7, 146.9, 140.5, 139.6, 130.7, 130.3, 128.9, 128.8, 128.4, 128.2, 128.1, 127.6, 127.3, 126.9, 119.1, 118.2, 87.5, 87.0, 78.8, 78.3, 72.2, 71.9, 61.2, 56.6, 53.5, 9.4, 9.2; **HRMS** (ESI) for  $\text{C}_{33}\text{H}_{36}\text{ClIrN}_2\text{O}_2$   $[\text{M}+\text{H}]^+$ :  $m/z$  calc: 721.2167. Found: 721.2127; **CHN** calculated: C 55.03, H 5.04, N 3.89. Found: C 52.33, H 4.86, N 2.92.

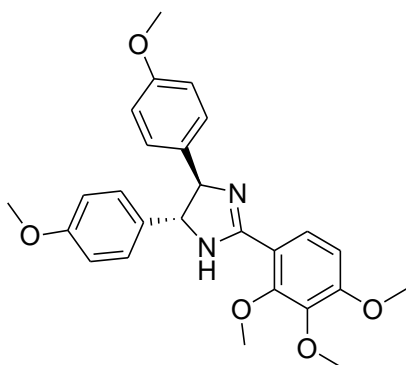

**(4*R*,5*R*)-4,5-bis(4-methoxyphenyl)-2-(2,3,4-trimethoxyphenyl)-4,5-dihydro-1*H*-imidazole:** Yellow solid;  $^1\text{H NMR}$  ( $\text{CDCl}_3$ , 400 MHz)  $\delta$

(ppm) 8.02 (d,  $J = 8.9$  Hz, 1H), 7.89 (d,  $J = 8.9$  Hz, 1H), 7.22 (d,  $J = 8.6$  Hz, 4H), 6.87 (d,  $J = 8.6$  Hz, 4H), 4.77 (s, 2H), 3.96 (s, 3H), 3.92 (s, 3H), 3.89 (s, 3H), 3.85 (s, 6H);  $^{13}\text{C}$  NMR ( $\text{CDCl}_3$ , 100 MHz)  $\delta$  (ppm) 161.4, 159.0, 156.0, 152.9, 142.0, 136.0, 127.7, 126.1, 114.1, 114.0, 107.9, 61.9, 61.0, 56.1, 55.3.

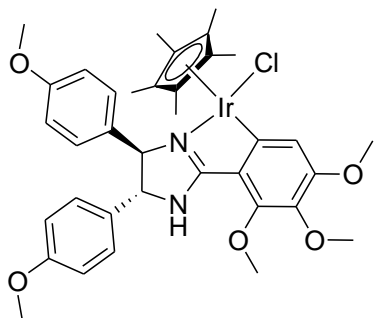

**Complex 12:** Yellow solid; A mixture of two isomers (6.5:1 ratio);  $^1\text{H}$  NMR ( $\text{CDCl}_3$ , 400 MHz)  $\delta$  (ppm) 7.44-6.82 (m, 9H, including  $\text{CDCl}_3$ ), 6.59-6.38 (m, 1.35H), 5.64-5.51 (m, 1H), 5.13-5.04 (m, 0.15H), 4.90 (d,  $J = 10.5$  Hz, 0.15H), 4.83-4.53 (m, 1H), 4.02-3.46 (m, 16H), 3.27-3.15 (m, 1.25H), 1.46 (s, 15H), 1.40 (s, 2.3H);  $^{13}\text{C}$  NMR ( $\text{CDCl}_3$ , 100 MHz)  $\delta$  (ppm) 176.4, 159.0, 156.7, 151.5, 135.8, 132.4, 132.0, 130.0, 128.6, 128.4, 114.1, 113.9, 113.3, 88.2, 87.6, 87.2, 88.0, 78.0, 71.7, 61.1, 60.7, 55.8, 55.4, 55.3, 55.0, 53.5, 9.5, 9.3, 9.3; **HRMS** (ESI) for  $\text{C}_{36}\text{H}_{42}\text{ClIrN}_2\text{O}_5$  [ $\text{M}$ ]:  $m/z$  calc: 810.2411. Found: 810.2417.

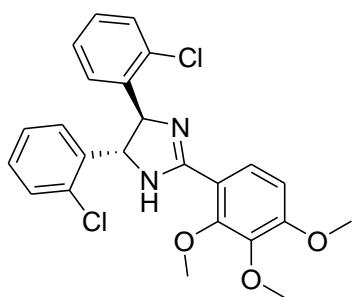

**(4R,5R)-4,5-bis(2-chlorophenyl)-2-(2,3,4-trimethoxyphenyl)-4,5-dihydro-1H-imidazole:** Yellow solid;  $^1\text{H}$  NMR ( $\text{CDCl}_3$ , 400 MHz)  $\delta$  (ppm) 8.04 (d,  $J = 9.0$  Hz, 1H), 7.55 (d,  $J = 6.5$  Hz, 2H), 7.35 (d,  $J = 7.9$  Hz, 2H), 7.3-7.26 (m, 2H, plus  $\text{CHCl}_3$ ), 7.23-7.19 (m, 2H), 6.80 (d,  $J = 8.9$  Hz, 1H), 5.42 (bs, 2H), 3.93 (s, 3H), 3.91 (s, 3H), 3.89 (s, 3H);  $^{13}\text{C}$  NMR ( $\text{CDCl}_3$ , 100 MHz)  $\delta$  (ppm) 162.2, 156.1, 152.9, 142.1, 141.1, 133.0, 129.5, 128.5, 127.3, 126.0, 115.8, 107.9, 61.8, 61.0, 56.2; **HRMS** (CI) for  $\text{C}_{24}\text{H}_{22}\text{Cl}_2\text{N}_2\text{O}_3$  [ $\text{M}+\text{H}$ ] $^+$ :  $m/z$  calc: 457.1080. Found: 457.1095.

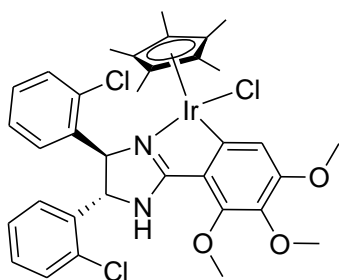

**Complex 13:** Yellow solid; A mixture of two isomers (1.5:1 ratio);

$^1\text{H NMR}$  ( $\text{CDCl}_3$ , 400 MHz)  $\delta$  (ppm) 7.69 (d,  $J = 7.8$  Hz, 1H), 7.42-7.29 (m, 5H), 7.24-7.17 (m, 2H), 7.11 (s, 0.4H), 7.07 (s, 0.6H), 6.52 (s, 1H), 5.62 (d,  $J = 10.7$  Hz, 0.6H), 5.52 (d,  $J = 4.5$  Hz, 0.4H), 5.43 (d,  $J = 10.7$  Hz, 0.6H), 5.27 (d,  $J = 4.5$  Hz, 0.4H), 4.02 (s, 2H), 4.01 (m, 3H), 3.99 (s, 1H), 3.82 (s, 1H), 3.79 (s, 2H), 1.49 (s, 9H), 1.48 (s, 6H);  $^{13}\text{C NMR}$  ( $\text{CDCl}_3$ , 100 MHz)  $\delta$  (ppm) 177.0, 176.2, 161.6, 133.0, 132.7, 130.1, 129.9, 129.3, 129.0, 128.9, 128.7, 128.3, 128.3, 127.4, 127.2, 113.9, 113.4, 87.8, 87.1, 73.2, 67.8, 61.2, 60.8, 55.8, 53.4, 9.3, 9.1; **HRMS** (ESI) for  $\text{C}_{34}\text{H}_{36}\text{Cl}_3\text{IrN}_2\text{O}_3$   $[\text{M}]^+$ :  $m/z$  calc: 818.1421. Found: 818.1422.

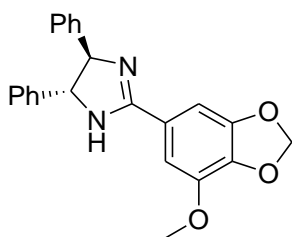

**(4R,5R)-2-(7-Methoxybenzo[d][1,3]dioxol-5-yl)-4,5-diphenyl-4,5-**

**dihydro-1H-imidazole:** Yellow solid;  $^1\text{H NMR}$  ( $\text{CDCl}_3$ , 400 MHz)  $\delta$  (ppm) 7.35-7.27 (m, 11H), 7.06 (s, 1H), 6.04 (s, 2H), 4.88 (s, 2H), 3.95 (s, 3H);  $^{13}\text{C NMR}$  ( $\text{CDCl}_3$ , 100 MHz)  $\delta$  (ppm) 171.1, 162.9, 148.9, 143.7, 143.2, 137.9, 128.8, 127.6, 126.6, 107.8, 102.1, 101.7, 56.9. **MS** (ESI) for  $\text{C}_{23}\text{H}_{20}\text{N}_2\text{O}_3$   $[\text{M}+\text{H}]^+$ :  $m/z$  calc: 373.2. Found: 373.2.

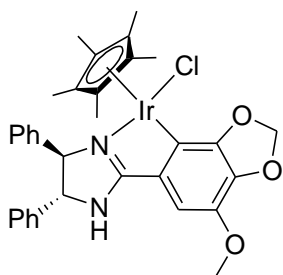

**Complex 14:** Yellow solid; A mixture of two isomers (2.9:1 ratio);  $^1\text{H}$

**NMR** ( $\text{CDCl}_3$ , 400 MHz)  $\delta$  (ppm) 7.57-7.07 (m, 15H plus  $\text{CDCl}_3$ ), 6.83 (s, 1H), 6.76 (s, 0.35H), 6.09 (bs, 1H), 5.97 (bs, 1.7H), 5.08 (bs, 0.35H), 4.93 (d,  $J = 10.8$  Hz, 1H), 4.73 (d,  $J = 10.8$  Hz, 1H), 4.62 (bs, 0.35H), 3.78 (s, 4.05H, minor+major isomers), 1.46 (bs, 20.25H, minor+major isomers);  $^{13}\text{C NMR}$  ( $\text{CDCl}_3$ , 100 MHz)  $\delta$  (ppm) 177.4, 171.2, 151.5, 140.5, 140.0, 139.8, 137.3, 131.2, 129.0, 128.9, 128.7, 128.4, 128.2, 128.1, 127.4, 106.9, 100.0, 88.2, 87.5, 79.6, 71.6, 56.5,

9.9, 9.6, 9.4; **HRMS** (ESI) for  $C_{33}H_{34}ClIrN_2O_3[M]^+$ :  $m/z$  calc: 734.1882. Found: 734.1880; **CHN** calculated: C 53.98, H 4.67, N 3.81. Found: C 53.08, H 4.66, N 3.42.

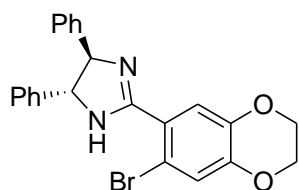

**(4R,5R)-2-(7-bromo-2,3-dihydrobenzo[*b*][1,4]dioxin-6-yl)-4,5-diphenyl-4,5-dihydro-1H-imidazole**: White solid;  $^1H$  NMR ( $CDCl_3$ , 400 MHz)  $\delta$  (ppm) 7.46 (s, 1H), 7.36-7.32 (m, 10H), 7.14 (s, 1H), 4.88 (s, 2H), 4.41-4.39 (m, 1H), 4.29-4.26 (m, 3H); **HRMS** (ESI) for  $C_{23}H_{19}BrN_2O_2 [M+H]^+$ :  $m/z$  calc: 435.0703. Found: 435.0702.

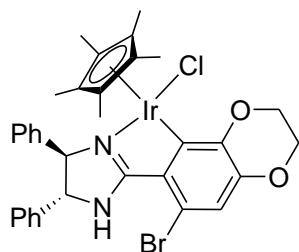

**Complex 15**: Yellow solid; A mixture of two isomers (2.5:1);  $^1H$  NMR ( $CDCl_3$ , 400 MHz)  $\delta$  (ppm) 7.47-7.36 (m, 7H), 7.35-7.23 (m, 7H), 7.08 (s, 0.4H), 6.81 (s, 1H), 5.05-4.97 (m, 0.4H), 4.95-4.83 (m, 2H), 4.70-4.64 (m, 0.4H), 4.40-4.19 (m, 5.6H), 1.47 (s, 15H), 1.43 (s, 6H);  $^{13}C$  NMR ( $CDCl_3$ , 100 MHz)  $\delta$  (ppm) 176.1, 158.8, 146.1, 144.9, 141.9, 140.7, 139.5, 129.1, 129.0, 128.9, 128.5, 128.4, 128.3, 128.1, 128.0, 127.5, 127.1, 127.0, 124.7, 117.1, 111.8, 88.9, 88.7, 88.2, 87.9, 87.4, 82.9, 78.8, 78.0, 72.1, 71.0, 70.8, 64.5, 64.4, 63.8, 63.7, 53.5, 9.9, 9.5.

#### Analytic data for Amine Products

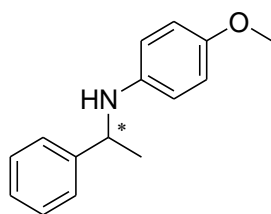

**4-Methoxy-*N*-(1-phenylethyl)aniline**:<sup>[9]</sup> White solid isolated in 90% yield;  $^1H$  NMR ( $CDCl_3$ , 400 MHz)  $\delta$  (ppm) 7.37-7.29 (m, 4H), 7.23-7.20 (m, 1H), 6.79 (d,  $J = 8.4$  Hz, 2H), 6.49 (d,  $J = 8.4$  Hz, 2H), 4.21 (q,  $J = 6.6$  Hz, 1H), 3.69 (s, 3H), 1.51 (d,  $J = 6.6$  Hz, 3H);  $^{13}C$  NMR ( $CDCl_3$ , 100 MHz)  $\delta$  (ppm) 152.1, 145.2, 141.2, 128.6, 126.9, 126.0, 114.9, 114.8, 55.7, 54.5, 25.0; **HRMS** (CI) for  $C_{15}H_{17}NO [M+H]^+$ :  $m/z$  calc: 228.1383. Found:



228.1386; **CHN** calculated: C 79.26, H 7.54, N 6.16. Found: C 79.42, H 7.50, N 5.95; **HPLC** (Chiralpak IB-3, 98:2 Hex:IPA + 0.1% HNEt<sub>2</sub>, 1 mL/min, 25 °C, 254 nm) 7.14 min (major) and 8.61 min.

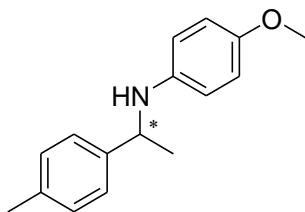

**4-Methoxy-N-(1-(p-tolyl)ethyl)aniline:**<sup>[10]</sup> White solid isolated in 95% yield; **<sup>1</sup>H NMR** (CDCl<sub>3</sub>, 400 MHz)  $\delta$  (ppm) 7.24 (d,  $J = 7.9$  Hz, 2H), 7.12 (d,  $J = 7.9$  Hz, 2H), 6.69 (d,  $J = 8.8$  Hz, 2H), 6.48 (d,  $J = 8.8$  Hz, 2H), 4.38 (q,  $J = 6.7$  Hz, 1H), 3.69 (s, 3H), 3.32 (s, 3H), 1.48 (d,  $J = 6.7$  Hz, 3H); **<sup>13</sup>C NMR** (CDCl<sub>3</sub>, 100 MHz)  $\delta$  (ppm) 142.5, 141.7, 136.3, 129.3, 128.5, 125.8, 114.8, 114.6, 55.8, 54.0, 25.1, 21.1; **HRMS** (CI) for C<sub>16</sub>H<sub>19</sub>NO [M+H]<sup>+</sup> calc: 242.1539. Found: 242.1544; **CHN** calculated: C 79.63, H 7.94, N 5.80. Found: C 79.88, H 7.81, N 4.7; **HPLC** (Chiralpak IB-3, 98:2 Hex:IPA + 0.1% HNEt<sub>2</sub>, 1 mL/min, 25 °C, 254 nm) 11.16 min and 11.99 min (major).

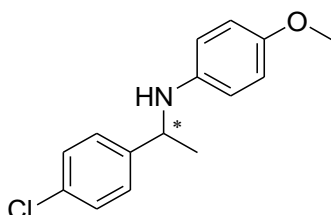

**N-(1-(4-Chlorophenyl)ethyl)-4-methoxyaniline:**<sup>[10]</sup> Orange oil isolated in 94% yield (in the organic system) and 80% yield (in the aqueous system); **<sup>1</sup>H NMR** (CDCl<sub>3</sub>, 400 MHz)  $\delta$  (ppm) 7.31-7.25 (m, 4H), 6.69 (d,  $J = 8.9$  Hz, 2H), 6.43 (d,  $J = 8.9$  Hz, 2H), 4.37 (q,  $J = 6.7$  Hz, 1H), 3.69 (s, 3H), 1.47 (d,  $J = 6.7$  Hz, 3H); **<sup>13</sup>C NMR** (CDCl<sub>3</sub>, 100 MHz)  $\delta$  (ppm) 152.1, 144.0, 141.1, 132.3, 128.8, 127.3, 114.8, 114.7, 55.7, 53.8, 25.1; **HRMS** (CI) for C<sub>15</sub>H<sub>16</sub>ClNO [M+H]<sup>+</sup>: m/z calc: 262.0993. Found: 262.0992; **CHN** calculated: C 68.83, H 6.16, N 5.35. Found: C 69.73, H 6.33, N 5.12; **HPLC** (Chiralpak IB-3, 98:2 Hex:IPA + 0.1% HNEt<sub>2</sub>, 1 mL/min, 25 °C, 254 nm) 17.23 min and 18.83 min (major).

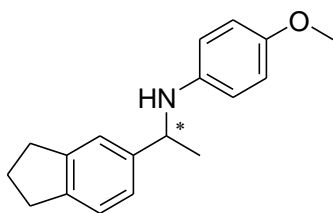

***N*-(1-(2,3-Dihydro-1*H*-inden-5-yl)ethyl)-4-methoxyaniline:**

Orange oil isolated in 80% yield;  $^1\text{H NMR}$  ( $\text{CDCl}_3$ , 400 MHz)  $\delta$  (ppm) 7.22 (s, 1H), 7.13 (q,  $J = 7.7$  Hz, 2H), 6.69 (d,  $J = 8.9$  Hz, 2H), 6.49 (d,  $J = 8.9$  Hz, 2H), 4.38 (q,  $J = 6.7$  Hz, 1H), 3.69 (s, 3H), 2.87 (t,  $J = 7.7$  Hz, 4H), 2.05 (quin,  $J = 7.5$  Hz, 2H), 1.48 (d,  $J = 6.7$  Hz, 3H);  $^{13}\text{C NMR}$  ( $\text{CDCl}_3$ , 100 MHz)  $\delta$  (ppm) 151.9, 144.7, 143.4, 142.9, 124.4, 123.8, 121.8, 114.8, 114.6, 55.8, 54.3, 32.9, 32.5, 25.5, 25.3; **HRMS** (CI) for  $\text{C}_{18}\text{H}_{21}\text{NO}$   $[\text{M}+\text{H}]^+$ :  $m/z$  calc: 268.1696. Found: 268.1706; **HPLC** (Chiralpak IB-3, 98:2 Hex:IPA + 0.1%  $\text{HNEt}_2$ , 1 mL/min, 25 °C, 254 nm) 10.85 min and 11.80 min (major).

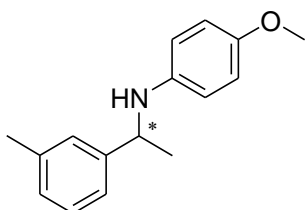

**4-Methoxy-*N*-(1-(*m*-tolyl)ethyl)aniline:**<sup>[11]</sup> Yellow oil isolated in

96% yield;  $^1\text{H NMR}$  ( $\text{CDCl}_3$ , 400 MHz)  $\delta$  (ppm) 7.21-7.14 (m, 3H), 7.03 (d,  $J = 7.1$  Hz, 1H), 6.69 (d,  $J = 8.5$  Hz, 2H), 6.48 (d,  $J = 8.9$  Hz, 2H), 4.36 (q,  $J = 6.7$  Hz, 1H), 3.69 (s, 3H), 2.33 (s, 3H), 1.48 (d,  $J = 6.7$  Hz, 3H);  $^{13}\text{C NMR}$  ( $\text{CDCl}_3$ , 100 MHz)  $\delta$  (ppm) 152.0, 145.4, 141.5, 138.2, 128.5, 127.7, 126.6, 123.0, 114.8, 114.7, 55.8, 54.4, 25.0, 21.5. **HRMS** (CI) for  $\text{C}_{16}\text{H}_{19}\text{NO}$   $[\text{M}+\text{H}]^+$ :  $m/z$  calc: 242.1539. Found: 242.1536; **CHN** calculated: C 79.63, H 7.94, N 5.80. Found: C 80.43, H 7.98, N 5.57; **HPLC** (Chiralpak IB-3, 98:2 Hex:IPA + 0.1%  $\text{HNEt}_2$ , 1 mL/min, 25 °C, 254 nm) 11.12 min and 12.25 min (major).

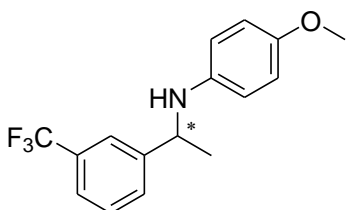

**4-Methoxy-*N*-(1-(3-(trifluoromethyl)phenyl)ethyl)aniline:**<sup>[11]</sup>

Yellow oil isolated in 95% yield;  $^1\text{H NMR}$  ( $\text{CDCl}_3$ , 400 MHz)  $\delta$  (ppm) 7.63 (bs, 1H), 7.55 (d,  $J = 6.4$  Hz, 1H), 7.48 (d,  $J = 6.4$  Hz, 1H), 7.42 (d,  $J = 7.1$  Hz, 1H), 6.69 (d,  $J = 6.9$  Hz, 2H), 6.43 (d,  $J = 7.0$  Hz, 2H), 4.45 (m, 1H), 3.69 (s, 3H), 1.49 (d,  $J = 6.2$  Hz, 3H);  $^{13}\text{C NMR}$  ( $\text{CDCl}_3$ , 100 MHz)  $\delta$  (ppm) 152.2, 146.8, 141.1, 129.3, 129.1, 123.8, 123.8, 122.8, 122.8, 114.8, 114.6,

55.7, 54.2, 25.2; **HRMS** (CI) for  $C_{16}H_{16}F_3NO$   $[M+H]^+$ :  $m/z$  calc: 296.1257. Found: 296.1267; **CHN** calculated: C 65.08, H 5.46, N 4.74. Found: C 65.78, H 5.52, N 4.33; **HPLC** (Chiralpak IB-3, 98:2 Hex:IPA + 0.1% HNEt<sub>2</sub>, 1 mL/min, 25 °C, 254 nm) 15.81 min and 20.08 min (major).

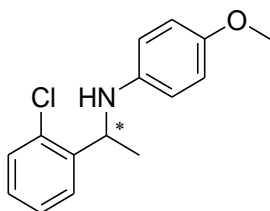

***N*-(1-(2-Chlorophenyl)ethyl)-4-methoxyaniline:**<sup>[11]</sup> Orange oil isolated in 88% yield; **<sup>1</sup>H NMR** (CDCl<sub>3</sub>, 400 MHz)  $\delta$  (ppm) 7.45 (dd,  $J = 7.5, 1.8$  Hz, 1H), 7.34 (dd,  $J = 7.5, 0.9$  Hz, 1H), 7.20-7.12 (m, 2H), 6.68 (d,  $J = 8.8$  Hz, 2H), 6.40 (d,  $J = 8.8$  Hz, 2H), 4.83 (q,  $J = 6.6$  Hz, 1H), 3.86 (bs, 1H), 3.68 (s, 3H), 1.48 (d,  $J = 6.6$  Hz, 3H); **<sup>13</sup>C NMR** (CDCl<sub>3</sub>, 100 MHz)  $\delta$  (ppm) 152.0, 142.3, 141.0, 132.5, 129.7, 128.0, 127.2, 126.8, 114.8, 114.3, 55.7, 50.9, 23.0; **HRMS** (CI) for  $C_{15}H_{16}ClNO$   $[M+H]^+$ :  $m/z$  calc: 262.0993. Found: 262.1002; **CHN** calculated: C 68.83, H 6.16, N 5.35. Found: C 68.75, H 6.20, N 4.94; **HPLC** (Chiralpak IB-3, 98:2 Hex:IPA + 0.1% HNEt<sub>2</sub>, 1 mL/min, 25 °C, 254 nm) 10.38 min (major) and 11.56 min.

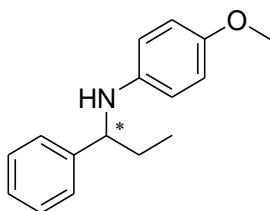

**4-Methoxy-*N*-(1-phenylpropyl)aniline:**<sup>[11]</sup> Orange oil isolated in 88% yield; **<sup>1</sup>H NMR** (CDCl<sub>3</sub>, 400 MHz)  $\delta$  (ppm) 7.34-7.28 (m, 4H), 7.23-7.20 (m, 1H), 6.70-6.66 (m, 2H), 6.79-6.45 (m, 2H), 4.15 (t,  $J = 6.7$  Hz, 1H), 3.68 (s, 3H), 1.80 (dq,  $J = 16.1, 7.4$  Hz, 2H), 0.94 (t,  $J = 7.4$  Hz, 3H); **<sup>13</sup>C NMR** (CDCl<sub>3</sub>, 100 MHz)  $\delta$  (ppm) 151.8, 144.2, 141.8, 128.5, 126.8, 126.6, 114.8, 114.4, 60.6, 55.8, 31.7, 10.9; **HRMS** (CI) for  $C_{16}H_{19}NO$   $[M+H]^+$ :  $m/z$  calc: 242.1539. Found: 242.1547; **CHN**  $C_{16}H_{19}NO$  calculated C 79.63, H 7.94, N 5.80. Found: C 80.94, H 8.03, N 5.58; **HPLC** (Chiralpak IB-3, 98:2 Hex:IPA + 0.1% HNEt<sub>2</sub>, 1 mL/min, 25 °C, 254 nm) 8.57 min and 9.21 min (major).

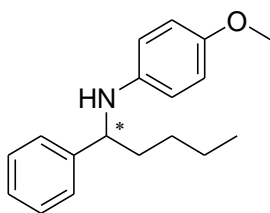

**4-Methoxy-*N*-(1-phenylpentyl)aniline:**<sup>[12]</sup> Yellow oil isolated in 75% yield (in the organic system) and 84% yield (in the aqueous system); **<sup>1</sup>H NMR** (CDCl<sub>3</sub>, 400 MHz) δ (ppm) 7.34-7.20 (m, 5H), 6.68-6.62(m, 4H), 4.2 (t, *J* = 7.0 Hz, 1H), 3.68 (s, 3H), 1.96-1.87 (m, 2H), 1.31-1.21 (m, 4H), 0.84 (t, *J* = 7.0 Hz, 3H); **<sup>13</sup>C NMR** (CDCl<sub>3</sub>, 100 MHz) δ (ppm) 141.6, 128.6, 127.3, 127.0, 116.7, 114.6, 55.7, 45.7, 37.4, 28.4, 22.5, 14.7, 14.0, 6.6; **HRMS** (CI) for C<sub>18</sub>H<sub>23</sub>NO [M+H]<sup>+</sup>: m/z calc: 270.1852. Found: 270.1863; **CHN** calculated: C 80.26, H 8.61, N 5.20. Found: C 81.26, H 8.64, N 4.78; **HPLC** (Chiralpak IB-3, 98:2 Hex:IPA + 0.1% HNEt<sub>2</sub>, 1 mL/min, 25 °C, 254 nm) 7.60 min and 8.16 min (major).

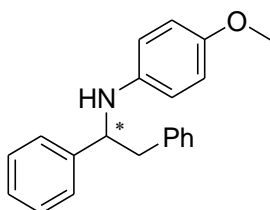

***N*-(1,2-Diphenylethyl)-4-methoxyaniline:**<sup>[13]</sup> Yellow oil isolated in 38% yield (in the organic system) and 76% yield (in the aqueous system); **<sup>1</sup>H NMR** (CDCl<sub>3</sub>, 400 MHz) δ (ppm) 8.02-7.97 (m, 2H), 7.55-7.44 (m, 3H), 7.32-7.30 (m, 3H), 7.12 (d, *J* = 7.2 Hz, 2H), 6.64 (d, *J* = 8.8 Hz, 2H), 6.41 (d, *J* = 8.8 Hz, 2H), 4.50 (dd, *J* = 8.0, 5.9 Hz, 1H), 3.11 (dd, *J* = 13.9, 5.9 Hz, 1H), 3.66 (s, 3H), 2.99 (dd, *J* = 14.0, 8.3 Hz, 1H); **<sup>13</sup>C NMR** (CDCl<sub>3</sub>, 100 MHz) δ (ppm) 129.9, 129.5, 129.2, 129.0, 128.7, 128.6, 128.5, 127.0, 126.7, 126.5, 114.9, 114.7, 60.1, 55.7, 45.3; **HRMS** (CI) for C<sub>21</sub>H<sub>21</sub>NO [M+H]<sup>+</sup>: m/z calc: 304.1696. Found: 304.1709; **HPLC** (Chiralpak IB-3, 98:2 Hex:IPA + 0.1% HNEt<sub>2</sub>, 1 mL/min, 25 °C, 254 nm) 10.51 min and 13.99 min (major).

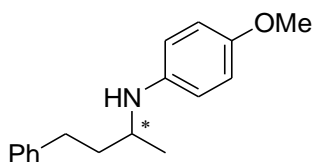

**4-Methoxy-*N*-(4-phenylbutan-2-yl)aniline:**<sup>[10]</sup> Yellow oil isolated in 97% yield; **<sup>1</sup>H NMR** (CDCl<sub>3</sub>, 400 MHz) δ (ppm) 7.30-7.28 (m, 2H), 7.19-7.17 (m, 3H), 6.78-6.74 (m, 2H), 6.53-6.50 (m, 2H), 3.74 (s, 3H), 3.42-3.37 (m, 1H), 2.78-2.70 (m, 2H), 1.89-1.71 (m, 2H), 1.19 (d, *J* = 6.2 Hz, 3H); **<sup>13</sup>C NMR** (CDCl<sub>3</sub>, 100 MHz) δ (ppm) 151.9, 142.1, 141.7, 128.5, 128.4, 126.1, 125.8, 115.0, 114.8, 55.8, 49.0, 38.9, 32.5, 20.9; **HRMS** (CI) for C<sub>17</sub>H<sub>21</sub>NO

[M+H]<sup>+</sup>: m/z calc: 256.1696. Found: 256.1703; **HPLC** (Chiralpak IB-3, 98:2 Hex:IPA + 0.1% HNEt<sub>2</sub>, 1 mL/min, 25 °C, 254 nm) 11.84 min and 12.39 min.

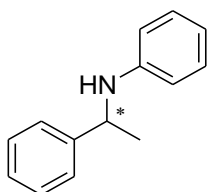

**N-(1-Phenylethyl)aniline:**<sup>[10]</sup> Yellow oil isolated in 37% yield (in the organic system) and 82% yield (in the aqueous system); **<sup>1</sup>H NMR** (CDCl<sub>3</sub>, 400 MHz) δ (ppm) 7.38-7.30 (m, 4H), 7.24-7.20 (m, 1H), 7.11-7.06 (m, 2H), 6.64 (t, *J* = 7.3 Hz, 1H), 6.52-6.50 (m, 2H), 4.48 (q, *J* = 6.7 Hz, 1H), 1.52 (d, *J* = 6.7 Hz, 3H); **<sup>13</sup>C NMR** (CDCl<sub>3</sub>, 100 MHz) δ (ppm) 129.1, 129.0, 128.7, 128.4, 126.9, 125.9, 119.4, 113.3, 53.5, 25.0; **HRMS** (CI) for C<sub>14</sub>H<sub>15</sub>N [M+H]<sup>+</sup>: m/z calc: 198.1277. Found: 198.1280; **CHN** calculated: C 85.24, H 7.66, N 7.10. Found: C 86.33, H 7.91, N 7.25; **HPLC** (Chiralpak IB-3, 98:2 Hex:IPA + 0.1% HNEt<sub>2</sub>, 1 mL/min, 25 °C, 254 nm) 8.25 min (major) and 9.57 min.

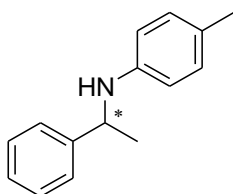

**4-Methyl-N-(1-phenylethyl)aniline:**<sup>[10]</sup> White solid isolated in 37% yield (in the organic system) and 84% yield (in the aqueous system); **<sup>1</sup>H NMR** (CDCl<sub>3</sub>, 400 MHz) δ (ppm) 7.37-7.29 (m, 4H), 7.23-7.20 (m, 1H), 6.90 (d, *J* = 8.2 Hz, 2H), 6.43 (d, *J* = 8.2 Hz, 2H), 4.45 (q, *J* = 6.7 Hz, 1H), 2.18 (s, 3H), 1.50 (d, *J* = 6.7 Hz, 3H); **<sup>13</sup>C NMR** (CDCl<sub>3</sub>, 100 MHz) δ (ppm) 129.6, 129.5, 128.6, 127.1, 126.8, 125.8, 119.4, 113.5, 53.7, 25.1, 20.4; **HRMS** (CI) for C<sub>15</sub>H<sub>17</sub>N [M+H]<sup>+</sup>: m/z calc: 212.1434. Found: 212.1442; **CHN** C<sub>15</sub>H<sub>17</sub>N calculated C 85.26, H 8.11, N 6.63. Found: C 85.01, H 8.19, N 6.60; **HPLC** (Chiralpak IB-3, 98:2 Hex:IPA + 0.1% HNEt<sub>2</sub>, 1 mL/min, 25 °C, 254 nm) 7.96 min and 8.73 min (major).

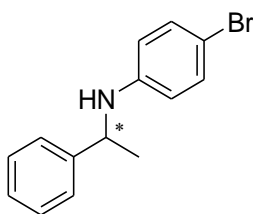

**4-Bromo-N-(1-phenylethyl)aniline:**<sup>[10]</sup> Yellow oil isolated in 8% yield (in the organic system) and 42% yield (in the aqueous system); **<sup>1</sup>H NMR** (CDCl<sub>3</sub>, 400 MHz) δ (ppm) 7.32-7.29 (m, 4H), 7.23-7.21 (m, 1H), 7.14 (d, *J* = 8.5 Hz, 2H), 6.36 (d, *J* = 8.5 Hz, 2H),

4.42 (q,  $J = 6.7$  Hz, 1H), 1.50 (d,  $J = 6.7$  Hz, 3H);  $^{13}\text{C NMR}$  ( $\text{CDCl}_3$ , 100 MHz)  $\delta$  (ppm) 146.2, 144.6, 131.8, 128.8, 127.1, 125.8, 114.9, 108.9, 55.5, 25.0; **HRMS** (CI) for  $\text{C}_{14}\text{H}_{14}\text{BrN}$   $[\text{M}+\text{H}]^+$ :  $m/z$  calc: 276.0382. Found: 276.0382; **CHN** calculated: C 60.89, H 5.11, N 5.07. Found: C 61.59, H 5.43, N 4.77; **HPLC** (Chiralpak IB-3, 98:2 Hex:IPA + 0.1%  $\text{HNEt}_2$ , 1 mL/min, 25 °C, 254 nm) 9.77 min and 11.59 min (major).

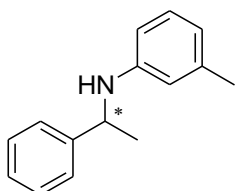

**3-Methyl-N-(1-phenylethyl)aniline:**<sup>[14]</sup> Orange oil isolated in 47% yield;  $^1\text{H NMR}$  ( $\text{CDCl}_3$ , 400 MHz)  $\delta$  (ppm) 7.38-7.31 (m, 4H), 7.24-7.22 (m, 1H), 6.97 (t,  $J = 7.8$  Hz, 1H), 6.47 (d,  $J = 7$  Hz, 1H), 6.36 (s, 1H), 6.3 (dd,  $J = 8, 2.2$  Hz, 1H), 4.47 (q,  $J = 6.7$  Hz, 1H), 2.21 (s, 3H), 1.50 (d,  $J = 6.7$  Hz, 3H);  $^{13}\text{C NMR}$  ( $\text{CDCl}_3$ , 100 MHz)  $\delta$  (ppm) 147.3, 145.4, 138.9, 129.0, 128.6, 126.8, 125.9, 118.2, 114.1, 110.3, 53.4, 25.0, 21.6; **HRMS** (CI) for  $\text{C}_{15}\text{H}_{17}\text{N}$   $[\text{M}+\text{H}]^+$ :  $m/z$  calc: 212.1434. Found: 212.1443; **CHN** calculated: C 85.26, H 8.11, N 6.63. Found: C 85.19, H 8.27, N 6.79; **HPLC** (Chiralpak IB-3, 98:2 Hex:IPA + 0.1%  $\text{HNEt}_2$ , 1 mL/min, 25 °C, 254 nm) 7.24 min (major) and 8.66 min.

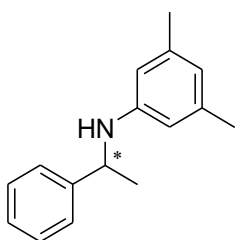

**3,5-Dimethyl-N-(1-phenylethyl)aniline:**<sup>[15]</sup> Yellow oil isolated in 50% yield (in the organic system) and 65% yield (in the aqueous system);  $^1\text{H NMR}$  ( $\text{CDCl}_3$ , 400 MHz)  $\delta$  (ppm) 7.37-7.29 (m, 4H), 7.23-7.20 (m, 1H), 6.31 (s, 1H), 6.16 (s, 2H), 4.47 (q,  $J = 6.7$  Hz, 1H), 2.16 (s, 6H), 1.48 (d,  $J = 6.7$  Hz, 3H);  $^{13}\text{C NMR}$  ( $\text{CDCl}_3$ , 100 MHz)  $\delta$  (ppm) 147.4, 145.5, 138.8, 128.6, 126.8, 125.9, 119.3, 111.2, 53.3, 25.0, 21.5; **HRMS** (CI) for  $\text{C}_{16}\text{H}_{19}\text{N}$   $[\text{M}+\text{H}]^+$ :  $m/z$  calc: 226.1590. Found: 226.1591; **HPLC** (Chiralpak IB-3, 98:2 Hex:IPA + 0.1%  $\text{HNEt}_2$ , 1 mL/min, 25 °C, 254 nm) 6.21 min (major) and 6.84 min.

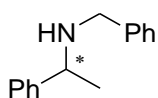

**N-Benzyl-1-phenylethanamine:**<sup>[9]</sup> Yellow oil isolated in 80 yield (in the organic system) and 97% yield (in the aqueous system);  $^1\text{H NMR}$  ( $\text{CDCl}_3$ , 400 MHz)  $\delta$  (ppm) 7.36-

7.21 (m, 10H), 3.81 (q,  $J = 6.6$  Hz, 1H), 3.62 (q,  $J = 13.1$  Hz, 2H), 1.63 (bs, 1H), 1.37 (d,  $J = 6.6$  Hz, 3H);  $^{13}\text{C NMR}$  ( $\text{CDCl}_3$ , 100 MHz)  $\delta$  (ppm) 145.6, 140.6, 128.5, 128.4, 128.2, 127.0, 126.9, 126.7, 57.5, 51.7, 24.6; **HRMS** (CI) for  $\text{C}_{15}\text{H}_{17}\text{N}$   $[\text{M}+\text{H}]^+$ :  $m/z$  calc: 212.1434. Found: 212.1444; **HPLC** (Chiralpak IB-3, 99:1 Hex:IPA + 0.1%  $\text{HNEt}_2$ , 1 mL/min, 25 °C, 254 nm) 5.65 min (major) and 6.09 min.

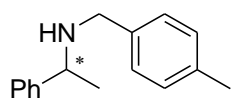

***N*-(4-Methylbenzyl)-1-phenylethanamine:**<sup>[16]</sup> Yellow oil isolated in 66% yield (in the organic system) and 94% yield (in the aqueous system);  $^1\text{H NMR}$  ( $\text{CDCl}_3$ , 400 MHz)  $\delta$  (ppm) 7.35-7.34 (m, 4H), 7.6-7.26 (m, 1H), 7.17-7.10 (m, 4H), 3.80 (q,  $J = 6.6$  Hz, 1H), 3.58 (q,  $J = 13.0$  Hz, 2H), 2.33 (s, 3H), 1.60 (bs, 1H), 1.35 (d,  $J = 6.6$  Hz, 3H);  $^{13}\text{C NMR}$  ( $\text{CDCl}_3$ , 100 MHz)  $\delta$  (ppm) 145.6, 137.6, 136.4, 129.1, 128.5, 128.1, 126.9, 126.8, 57.4, 51.4, 24.5, 21.3; **HRMS** (CI) for  $\text{C}_{16}\text{H}_{19}\text{N}$   $[\text{M}+\text{H}]^+$ :  $m/z$  calc: 226.1590. Found: 226.1596; **HPLC** (Chiralpak IB-3, 99.8:0.2 Hex:IPA (+ 0.1%  $\text{HNEt}_2$ ), 0.5 mL/min, 25 °C, 254 nm) 16.83 min (major) and 17.72 min.

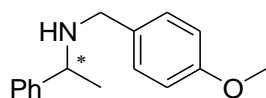

***N*-Benzyl-1-(4-nitrophenyl)ethanamine:**<sup>[17]</sup> Yellow oil isolated in 77% yield (in the organic system) and 93% yield (in the aqueous system);  $^1\text{H NMR}$  ( $\text{CDCl}_3$ , 400 MHz)  $\delta$  (ppm) 7.35-7.33 (m, 4H), 7.26-7.25 (m, 1H), 7.19 (d,  $J = 8.5$  Hz, 2H), 6.85 (d,  $J = 8.5$  Hz, 2H), 3.82-3.77 (m, 4H), 3.56 (q,  $J = 12.9$  Hz, 2H), 1.36 (d,  $J = 6.6$  Hz, 3H);  $^{13}\text{C NMR}$  ( $\text{CDCl}_3$ , 100 MHz)  $\delta$  (ppm) 158.6, 145.7, 132.8, 129.3, 128.5, 126.9, 126.7, 113.8, 57.4, 55.3, 51.1, 24.6; **HRMS** (CI) for  $\text{C}_{16}\text{H}_{19}\text{NO}$   $[\text{M}+\text{H}]^+$ :  $m/z$  calc: 242.1539. Found: 242.1545; **HPLC** (Chiralpak IB-3, 99.8:0.2 Hex:IPA (+ 0.1%  $\text{HNEt}_2$ ), 0.5 mL/min, 25 °C, 254 nm) 25.69 min (major) and 27.27 min.

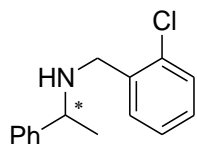

***N*-(2-Chlorobenzyl)-1-phenylethanamine:**<sup>[18]</sup> Yellow oil isolated in 90% yield (in the organic system) and 93% yield (in the aqueous system);  $^1\text{H NMR}$  ( $\text{CDCl}_3$ , 400 MHz)  $\delta$  (ppm) 7.39-7.30 (m, 6H), 7.26-7.23 (m, 1H), 7.22-7.16 (m, 2H), 3.82-3.67 (m, 3H), 1.8 (bs,

1H), 1.37 (d,  $J = 6.5$  Hz, 3H);  $^{13}\text{C}$  NMR (CDCl<sub>3</sub>, 100 MHz)  $\delta$  (ppm) 145.3, 137.8, 133.8, 130.5, 129.5, 128.5, 128.3, 127.0, 126.8, 57.4, 49.3, 24.6; HRMS (CI) for C<sub>15</sub>H<sub>16</sub>ClN [M+H]<sup>+</sup>: m/z calc: 246.1044. Found: 246.1055; HPLC (Chiralpak IB-3, 99.8:0.2 Hex:IPA (+ 0.1% HNEt<sub>2</sub>), 0.5 mL/min, 25 °C, 254 nm) 17.63 min (major) and 18.77 min.

#### Analytic data for piperidine products

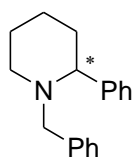

**1-Benzyl-2-phenylpiperidine:**<sup>[19]</sup> White solid isolated in 97% yield;  $^1\text{H}$  NMR (CDCl<sub>3</sub>, 400 MHz)  $\delta$  (ppm) 7.45 (d,  $J = 7.3$  Hz, 2H), 7.32 (t,  $J = 7.3$  Hz, 2H), 7.27-7.18 (m, 6H), 3.76 (d,  $J = 13.6$  Hz, 1H), 3.10 (dd,  $J = 11.0, 2.6$  Hz, 1H), 2.96 (d,  $J = 11.5$  Hz, 1H), 2.80 (d,  $J = 13.5$  Hz, 1H), 1.96-1.90 (m, 1H), 1.77 (d,  $J = 12.5$  Hz, 2H), 1.62-1.56 (m, 4H);  $^{13}\text{C}$  NMR (CDCl<sub>3</sub>, 100 MHz)  $\delta$  (ppm) 148.73, 139.82, 128.70, 128.49, 128.00, 127.46, 126.87, 126.51, 69.20, 59.79, 53.36, 37.01, 26.00, 25.25; HRMS (CI) for C<sub>18</sub>H<sub>21</sub>N [M+H]<sup>+</sup>: m/z calc: 252.1747. Found: 252.1753; HPLC (Chiracel OJ-3, 100% EtOH, 1 mL/min, 25 °C, 220 nm) 1.31 min and 1.66 min.

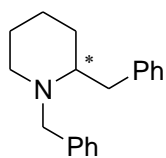

**1,2-Dibenzylpiperidine:**<sup>[19]</sup> White solid isolated in 75% yield;  $^1\text{H}$  NMR (CDCl<sub>3</sub>, 400 MHz)  $\delta$  (ppm) 7.37-7.27 (m, 5H), 7.24-7.13 (m, 5H), 4.05 (d,  $J = 13.6$  Hz, 1H), 3.49 (d,  $J = 13.6$  Hz, 1H), 3.70 (d,  $J = 9.7$  Hz, 1H), 2.8-2.74 (m, 1H), 2.68-2.59 (m, 2H), 2.22 (dt,  $J = 11.7, 6.0$  Hz, 1H), 1.66-1.61 (m, 1H), 1.54-1.5 (m, 3H), 1.36-1.26 (m, 2H);  $^{13}\text{C}$  NMR (CDCl<sub>3</sub>, 100 MHz)  $\delta$  (ppm) 129.4, 129.3, 128.8, 128.3, 128.2, 128.1, 128.0, 61.71, 58.5, 50.8, 36.5, 29.3, 25.4, 22.4; HRMS (ESI) for C<sub>19</sub>H<sub>23</sub>N [M+H]<sup>+</sup>: m/z calc: 266.1903. Found: 266.1910; HPLC (Chiracel OJ-3, 100% EtOH, 1 mL/min, 25 °C, 220 nm) 1.41 min and 1.99 min.



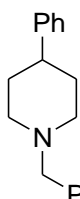

**1-Benzyl-4-phenylpiperidine:**<sup>[20,21]</sup> White solid isolated in 75% yield; **<sup>1</sup>H NMR** (CDCl<sub>3</sub>, 400 MHz)  $\delta$  (ppm) 7.39-7.30 (m, 9H), 7.24-7.20 (m, 1H), 6.06 (dt,  $J = 3.4, 1.8$  Hz, 1H), 3.64 (s, 2H), 3.18 (q,  $J = 2.8$  Hz, 2H), 2.72 (t,  $J = 5.8$  Hz, 2H), 2.58-2.55 (m, 2H), 1.83-1.80 (m, 1H), 1.58-1.56 (m, 1H); **<sup>13</sup>C NMR** (CDCl<sub>3</sub>, 100 MHz)  $\delta$  (ppm) 135.00, 129.26, 128.29, 128.27, 127.12, 124.92, 121.93, 62.76, 53.35, 49.99, 28.06; **HRMS** (CI) for C<sub>18</sub>H<sub>21</sub>N [M+H]<sup>+</sup>: m/z calc: 252.1747. Found: 252.1753.

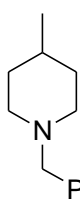

**1-Benzyl-4-methylpiperidine:**<sup>[21]</sup> White solid isolated in 80% yield; **<sup>1</sup>H NMR** (CDCl<sub>3</sub>, 400 MHz)  $\delta$  (ppm) 7.32-7.29 (m, 4H), 7.24-7.22 (m, 1H), 3.48 (s, 2H), 2.93 (quin,  $J = 2.05$  Hz, 1H), 2.83 (dt,  $J = 11.9, 3.0$  Hz, 2H), 2.55 (t,  $J = 5.8$  Hz, 1H), 1.93 (td,  $J = 11.5, 2.4$  Hz, 2H), 1.67 (d,  $J = 1.2$  Hz, 1H), 1.58 (dd,  $J = 12.6, 1.6$  Hz, 2H), 0.91 (d,  $J = 6.3$  Hz, 3H); **<sup>13</sup>C NMR** (CDCl<sub>3</sub>, 100 MHz)  $\delta$  (ppm) 129.24, 128.19, 128.10, 126.82, 63.59, 53.98, 53.98, 34.39, 30.81, 21.94; **HRMS** (CI) for C<sub>13</sub>H<sub>19</sub>N [M+H]<sup>+</sup>: m/z calc: 190.1590. Found: 190.1594.

### 3. Single crystal X-ray diffraction details

#### Crystallographic data of complex 1

CCDC number: CCDC 2031296

|                                                                                                                                                                                                                                                                                                                                                                                                                                                                                                                                                                                                                                                                                                                                                                                                                                                                                                                                                                                                                                                                 |  |
|-----------------------------------------------------------------------------------------------------------------------------------------------------------------------------------------------------------------------------------------------------------------------------------------------------------------------------------------------------------------------------------------------------------------------------------------------------------------------------------------------------------------------------------------------------------------------------------------------------------------------------------------------------------------------------------------------------------------------------------------------------------------------------------------------------------------------------------------------------------------------------------------------------------------------------------------------------------------------------------------------------------------------------------------------------------------|--|
| <p><math>[\text{Ir}(\text{Cl})(\text{C}_{21}\text{H}_{16}\text{ON})(\text{C}_{10}\text{H}_{15})]</math></p> <p><math>M = 661.22</math></p> <p>orange prism,</p> <p>0.40 x 0.30 x 0.20 mm<sup>3</sup></p> <p>monoclinic, space group <math>P2_1</math> (No. 4)</p> <p><math>a = 11.3621(9) \text{ \AA}</math></p> <p><math>b = 11.4447(9) \text{ \AA}</math></p> <p><math>c = 11.5177(9) \text{ \AA}</math></p> <p><math>\beta = 119.266(1)^\circ</math></p> <p><math>V = 1306.54(2) \text{ \AA}^3</math></p> <p><math>Z = 2</math></p> <p><math>D_c = 1.681 \text{ g/cm}^3</math></p> <p><math>T = 100(2)\text{K}</math></p> <p><math>2\theta_{\text{max}} = 55.0^\circ</math></p> <p>7488 reflections collected,</p> <p>5218 unique</p> <p>Multiscan absorption correction</p> <p><math>R_{\text{int}} = 0.0210</math></p> <p>Final <math>\text{Goof} = 0.748</math></p> <p><math>RI = 0.0197</math></p> <p><math>wR2 = 0.0442</math></p> <p>327 parameters, 1 restraint</p> <p>Flack parameter = 0.013(5)</p> <p><math>\mu = 5.236 \text{ mm}^{-1}</math></p> |  |
|-----------------------------------------------------------------------------------------------------------------------------------------------------------------------------------------------------------------------------------------------------------------------------------------------------------------------------------------------------------------------------------------------------------------------------------------------------------------------------------------------------------------------------------------------------------------------------------------------------------------------------------------------------------------------------------------------------------------------------------------------------------------------------------------------------------------------------------------------------------------------------------------------------------------------------------------------------------------------------------------------------------------------------------------------------------------|--|

### Data collection, structure solution and refinement

The crystals were large, good quality orange prisms. A suitably sized crystal with well defined habit was selected for the analysis. The crystal was mounted on a glass fibre and placed in a cold stream at 100K. Single crystal X-ray data were collected on a Bruker D8 diffractometer with an APEX CCD detector, and 1.5 kW graphite monochromated Mo radiation. The detector to crystal distance was 5.985 cm. Exposure times of 10 s per frame and scan widths of 0.3° were used throughout the data collection. The data collection was performed using two  $\omega$  scans with different  $\varphi$  values yielding data in the  $\theta$  range 4.10 to 27.5° with an average completeness of 97%. The frames were integrated with the SAINT v7.45a (Bruker, 2005).<sup>1</sup> A multi-scan correction was carried out using the program SADABS V2008-1 (Bruker, 2008)<sup>2</sup>.

The structure was solved and refined with X-SEED,<sup>3</sup> a graphical interface to SHELX (Sheldrick, 2008).<sup>4</sup> The hydrogen atoms were placed in geometrically idealized positions and were refined freely. In the final cycles of refinement all non-hydrogen atoms were refined anisotropically.

---

<sup>1</sup> Bruker (2009). SAINT V7.68a, BRUKER AXS Inc., Madison, WI, USA.

<sup>2</sup> Bruker (2008), SADABS V2008-1, BRUKER AXS Inc., Madison, WI, USA.

<sup>3</sup> Barbour, L. J. "X-Seed – A software tool for supramolecular crystallography" *J. Supramol. Chem.* **2001**, *1*, 189-191.

<sup>4</sup> Sheldrick, G.M. (2008). *Acta Cryst.* A64, 112-122.

Table 1. Crystal data and structure refinement for **1**.

|                                   |                                             |                    |
|-----------------------------------|---------------------------------------------|--------------------|
| Empirical formula                 | C <sub>31</sub> H <sub>31</sub> Cl Ir N O   |                    |
| Formula weight                    | 661.22                                      |                    |
| Temperature                       | 100(2) K                                    |                    |
| Wavelength                        | 0.71073 Å                                   |                    |
| Crystal system                    | Monoclinic                                  |                    |
| Space group                       | P21                                         |                    |
| Unit cell dimensions              | a = 11.3621(9) Å                            | α = 90°.           |
|                                   | b = 11.4447(9) Å                            | β = 119.2660(10)°. |
|                                   | c = 11.5177(9) Å                            | γ = 90°.           |
| Volume                            | 1306.54(18) Å <sup>3</sup>                  |                    |
| Z                                 | 2                                           |                    |
| Density (calculated)              | 1.681 Mg/m <sup>3</sup>                     |                    |
| Absorption coefficient            | 5.236 mm <sup>-1</sup>                      |                    |
| F(000)                            | 652                                         |                    |
| Crystal size                      | 0.40 x 0.30 x 0.20 mm <sup>3</sup>          |                    |
| Theta range for data collection   | 2.70 to 27.48°.                             |                    |
| Index ranges                      | -14 ≤ h ≤ 14, -13 ≤ k ≤ 14, -10 ≤ l ≤ 14    |                    |
| Reflections collected             | 7488                                        |                    |
| Independent reflections           | 5218 [R(int) = 0.0210]                      |                    |
| Completeness to theta = 27.48°    | 97.4 %                                      |                    |
| Absorption correction             | Semi-empirical from equivalents             |                    |
| Max. and min. transmission        | 0.4207 and 0.2285                           |                    |
| Refinement method                 | Full-matrix least-squares on F <sup>2</sup> |                    |
| Data / restraints / parameters    | 5206 / 1 / 327                              |                    |
| Goodness-of-fit on F <sup>2</sup> | 0.748                                       |                    |
| Final R indices [I > 2σ(I)]       | R1 = 0.0197, wR2 = 0.0442                   |                    |
| R indices (all data)              | R1 = 0.0206, wR2 = 0.0445                   |                    |
| Absolute structure parameter      | 0.013(5)                                    |                    |
| Largest diff. peak and hole       | 1.078 and -1.196 e.Å <sup>-3</sup>          |                    |

Table 2. Atomic coordinates ( $\times 10^4$ ) and equivalent isotropic displacement parameters ( $\text{\AA}^2 \times 10^3$ ) for **1**.  $U(\text{eq})$  is defined as one third of the trace of the orthogonalized  $U^{\text{ij}}$  tensor.

|       | x        | y        | z       | $U(\text{eq})$ |
|-------|----------|----------|---------|----------------|
| Ir(1) | 7319(1)  | 1855(1)  | 4684(1) | 9(1)           |
| Cl(1) | 6997(1)  | 2382(1)  | 6528(1) | 14(1)          |
| O(1)  | 3303(3)  | 2890(2)  | 2780(3) | 14(1)          |
| N(1)  | 5217(2)  | 1858(5)  | 3583(2) | 11(1)          |
| C(2)  | 4669(4)  | 2852(4)  | 3336(5) | 13(1)          |
| C(3)  | 4136(4)  | 949(4)   | 3031(4) | 9(1)           |
| C(4)  | 2947(3)  | 1689(4)  | 2948(3) | 12(1)          |
| C(5)  | 5494(4)  | 3884(3)  | 3598(4) | 12(1)          |
| C(6)  | 5011(4)  | 5027(3)  | 3314(4) | 16(1)          |
| C(7)  | 5923(4)  | 5921(3)  | 3593(4) | 15(1)          |
| C(8)  | 7296(4)  | 5662(3)  | 4170(4) | 14(1)          |
| C(9)  | 7769(4)  | 4517(4)  | 4483(4) | 14(1)          |
| C(10) | 6881(4)  | 3587(3)  | 4191(4) | 11(1)          |
| C(11) | 3930(4)  | 511(3)   | 1700(4) | 13(1)          |
| C(12) | 3971(4)  | 1271(4)  | 771(4)  | 17(1)          |
| C(13) | 3804(4)  | 848(4)   | -427(4) | 22(1)          |
| C(14) | 3608(4)  | -326(4)  | -719(4) | 26(1)          |
| C(15) | 3555(4)  | -1092(4) | 185(5)  | 26(2)          |
| C(16) | 3716(4)  | -673(4)  | 1390(4) | 19(1)          |
| C(17) | 1533(4)  | 1399(3)  | 1899(4) | 12(1)          |
| C(18) | 701(4)   | 2218(3)  | 976(4)  | 17(1)          |
| C(19) | -629(3)  | 1943(7)  | 64(3)   | 20(1)          |
| C(20) | -1122(4) | 837(4)   | 71(4)   | 22(1)          |
| C(21) | -289(4)  | 15(4)    | 989(4)  | 19(1)          |
| C(22) | 1036(4)  | 281(4)   | 1906(4) | 16(1)          |
| C(23) | 7984(4)  | 715(3)   | 3629(4) | 12(1)          |
| C(24) | 7968(4)  | 3(4)     | 4669(4) | 13(1)          |
| C(25) | 8875(4)  | 505(3)   | 5909(4) | 13(1)          |
| C(26) | 9458(4)  | 1566(3)  | 5670(4) | 14(1)          |
| C(27) | 8946(3)  | 1640(3)  | 4258(4) | 11(1)          |
| C(28) | 7300(4)  | 403(4)   | 2179(4) | 16(1)          |
| C(29) | 7149(4)  | -1076(4) | 4450(4) | 18(1)          |
| C(30) | 9201(4)  | 83(4)    | 7251(4) | 18(1)          |
| C(31) | 10499(4) | 2317(4)  | 6762(4) | 19(1)          |

C(32)

9380(4)

2478(3)

3537(4)

17(1)

---

Table 3. Bond lengths [Å] and angles [°] for **1**.

---

|             |            |
|-------------|------------|
| Ir(1)-Cl(1) | 2.4016(10) |
| Ir(1)-N(1)  | 2.085(2)   |
| Ir(1)-C(10) | 2.055(4)   |
| Ir(1)-C(23) | 2.156(4)   |
| Ir(1)-C(24) | 2.247(5)   |
| Ir(1)-C(25) | 2.251(4)   |
| Ir(1)-C(26) | 2.147(5)   |
| Ir(1)-C(27) | 2.146(4)   |
| O(1)-C(2)   | 1.360(6)   |
| O(1)-C(4)   | 1.472(5)   |
| N(1)-C(2)   | 1.261(7)   |
| N(1)-C(3)   | 1.494(6)   |
| C(2)-C(5)   | 1.445(6)   |
| C(3)-C(4)   | 1.557(6)   |
| C(3)-C(11)  | 1.518(6)   |
| C(4)-C(17)  | 1.501(6)   |
| C(5)-C(6)   | 1.394(5)   |
| C(5)-C(10)  | 1.419(7)   |
| C(6)-C(7)   | 1.378(6)   |
| C(7)-C(8)   | 1.396(7)   |
| C(8)-C(9)   | 1.395(6)   |
| C(9)-C(10)  | 1.390(6)   |
| C(11)-C(12) | 1.397(6)   |
| C(11)-C(16) | 1.392(6)   |
| C(12)-C(13) | 1.385(6)   |
| C(13)-C(14) | 1.377(6)   |
| C(14)-C(15) | 1.385(7)   |
| C(15)-C(16) | 1.393(7)   |
| C(17)-C(18) | 1.386(5)   |
| C(17)-C(22) | 1.400(6)   |
| C(18)-C(19) | 1.391(6)   |
| C(19)-C(20) | 1.386(9)   |
| C(20)-C(21) | 1.386(6)   |
| C(21)-C(22) | 1.386(7)   |
| C(23)-C(24) | 1.456(6)   |
| C(23)-C(27) | 1.437(5)   |
| C(23)-C(28) | 1.501(6)   |

|                  |          |
|------------------|----------|
| C(24)-C(25)      | 1.412(6) |
| C(24)-C(29)      | 1.492(7) |
| C(25)-C(26)      | 1.472(6) |
| C(25)-C(30)      | 1.483(6) |
| C(26)-C(27)      | 1.437(6) |
| C(26)-C(31)      | 1.505(6) |
| C(27)-C(32)      | 1.501(6) |
| C(3)-H(3)        | 1.0000   |
| C(4)-H(4)        | 1.0000   |
| C(6)-H(6)        | 0.9500   |
| C(7)-H(7)        | 0.9500   |
| C(8)-H(8)        | 0.9500   |
| C(9)-H(9)        | 0.9500   |
| C(12)-H(12)      | 0.9500   |
| C(13)-H(13)      | 0.9500   |
| C(14)-H(14)      | 0.9500   |
| C(15)-H(15)      | 0.9500   |
| C(16)-H(16)      | 0.9500   |
| C(18)-H(18)      | 0.9500   |
| C(19)-H(19)      | 0.9500   |
| C(20)-H(20)      | 0.9500   |
| C(21)-H(21)      | 0.9500   |
| C(22)-H(22)      | 0.9500   |
| C(28)-H(28A)     | 0.9800   |
| C(28)-H(28B)     | 0.9800   |
| C(28)-H(28C)     | 0.9800   |
| C(29)-H(29A)     | 0.9800   |
| C(29)-H(29B)     | 0.9800   |
| C(29)-H(29C)     | 0.9800   |
| C(30)-H(30A)     | 0.9800   |
| C(30)-H(30B)     | 0.9800   |
| C(30)-H(30C)     | 0.9800   |
| C(31)-H(31A)     | 0.9800   |
| C(31)-H(31B)     | 0.9800   |
| C(31)-H(31C)     | 0.9800   |
| C(32)-H(32A)     | 0.9800   |
| C(32)-H(32B)     | 0.9800   |
| C(32)-H(32C)     | 0.9800   |
| Cl(1)-Ir(1)-N(1) | 85.02(7) |



|                   |            |
|-------------------|------------|
| Cl(1)-Ir(1)-C(10) | 83.19(12)  |
| Cl(1)-Ir(1)-C(23) | 153.78(10) |
| Cl(1)-Ir(1)-C(24) | 115.83(11) |
| Cl(1)-Ir(1)-C(25) | 91.73(11)  |
| Cl(1)-Ir(1)-C(26) | 101.13(11) |
| Cl(1)-Ir(1)-C(27) | 138.71(11) |
| N(1)-Ir(1)-C(10)  | 77.3(2)    |
| N(1)-Ir(1)-C(23)  | 105.73(16) |
| N(1)-Ir(1)-C(24)  | 106.2(2)   |
| N(1)-Ir(1)-C(25)  | 134.21(19) |
| N(1)-Ir(1)-C(26)  | 170.29(17) |
| N(1)-Ir(1)-C(27)  | 136.02(13) |
| C(10)-Ir(1)-C(23) | 122.17(16) |
| C(10)-Ir(1)-C(24) | 160.71(17) |
| C(10)-Ir(1)-C(25) | 147.69(17) |
| C(10)-Ir(1)-C(26) | 110.69(17) |
| C(10)-Ir(1)-C(27) | 99.60(17)  |
| C(23)-Ir(1)-C(24) | 38.55(15)  |
| C(23)-Ir(1)-C(25) | 63.47(15)  |
| C(23)-Ir(1)-C(26) | 65.58(16)  |
| C(23)-Ir(1)-C(27) | 39.04(15)  |
| C(24)-Ir(1)-C(25) | 36.58(14)  |
| C(24)-Ir(1)-C(26) | 64.38(15)  |
| C(24)-Ir(1)-C(27) | 64.36(16)  |
| C(25)-Ir(1)-C(26) | 39.02(15)  |
| C(25)-Ir(1)-C(27) | 64.15(16)  |
| C(26)-Ir(1)-C(27) | 39.11(16)  |
| C(2)-O(1)-C(4)    | 103.4(3)   |
| Ir(1)-N(1)-C(2)   | 115.5(4)   |
| Ir(1)-N(1)-C(3)   | 135.8(4)   |
| C(2)-N(1)-C(3)    | 108.7(3)   |
| O(1)-C(2)-N(1)    | 117.3(4)   |
| O(1)-C(2)-C(5)    | 123.1(4)   |
| N(1)-C(2)-C(5)    | 119.5(5)   |
| N(1)-C(3)-C(4)    | 99.0(3)    |
| N(1)-C(3)-C(11)   | 110.4(4)   |
| C(4)-C(3)-C(11)   | 114.6(3)   |
| O(1)-C(4)-C(3)    | 103.3(3)   |
| O(1)-C(4)-C(17)   | 110.8(3)   |

|                   |          |
|-------------------|----------|
| C(3)-C(4)-C(17)   | 119.0(3) |
| C(2)-C(5)-C(6)    | 125.3(4) |
| C(2)-C(5)-C(10)   | 111.1(3) |
| C(6)-C(5)-C(10)   | 123.7(4) |
| C(5)-C(6)-C(7)    | 118.5(4) |
| C(6)-C(7)-C(8)    | 119.4(3) |
| C(7)-C(8)-C(9)    | 121.5(4) |
| C(8)-C(9)-C(10)   | 121.0(4) |
| Ir(1)-C(10)-C(5)  | 115.2(3) |
| Ir(1)-C(10)-C(9)  | 128.5(3) |
| C(5)-C(10)-C(9)   | 115.9(3) |
| C(3)-C(11)-C(12)  | 121.4(3) |
| C(3)-C(11)-C(16)  | 120.1(4) |
| C(12)-C(11)-C(16) | 118.5(4) |
| C(11)-C(12)-C(13) | 120.4(4) |
| C(12)-C(13)-C(14) | 120.8(4) |
| C(13)-C(14)-C(15) | 119.7(4) |
| C(14)-C(15)-C(16) | 119.9(4) |
| C(11)-C(16)-C(15) | 120.8(4) |
| C(4)-C(17)-C(18)  | 121.9(4) |
| C(4)-C(17)-C(22)  | 118.3(4) |
| C(18)-C(17)-C(22) | 119.8(4) |
| C(17)-C(18)-C(19) | 120.6(4) |
| C(18)-C(19)-C(20) | 119.7(5) |
| C(19)-C(20)-C(21) | 119.8(4) |
| C(20)-C(21)-C(22) | 121.0(4) |
| C(17)-C(22)-C(21) | 119.2(4) |
| Ir(1)-C(23)-C(24) | 74.1(3)  |
| Ir(1)-C(23)-C(27) | 70.1(2)  |
| Ir(1)-C(23)-C(28) | 129.6(3) |
| C(24)-C(23)-C(27) | 108.0(3) |
| C(24)-C(23)-C(28) | 125.1(4) |
| C(27)-C(23)-C(28) | 126.1(4) |
| Ir(1)-C(24)-C(23) | 67.3(2)  |
| Ir(1)-C(24)-C(25) | 71.9(2)  |
| Ir(1)-C(24)-C(29) | 127.0(3) |
| C(23)-C(24)-C(25) | 107.9(4) |
| C(23)-C(24)-C(29) | 125.6(4) |
| C(25)-C(24)-C(29) | 126.5(4) |

|                   |          |
|-------------------|----------|
| Ir(1)-C(25)-C(24) | 71.6(3)  |
| Ir(1)-C(25)-C(26) | 66.7(2)  |
| Ir(1)-C(25)-C(30) | 126.6(3) |
| C(24)-C(25)-C(26) | 108.6(4) |
| C(24)-C(25)-C(30) | 127.5(4) |
| C(26)-C(25)-C(30) | 123.9(4) |
| Ir(1)-C(26)-C(25) | 74.3(3)  |
| Ir(1)-C(26)-C(27) | 70.4(2)  |
| Ir(1)-C(26)-C(31) | 125.3(3) |
| C(25)-C(26)-C(27) | 106.9(3) |
| C(25)-C(26)-C(31) | 123.8(4) |
| C(27)-C(26)-C(31) | 129.1(4) |
| Ir(1)-C(27)-C(23) | 70.8(2)  |
| Ir(1)-C(27)-C(26) | 70.5(3)  |
| Ir(1)-C(27)-C(32) | 127.3(3) |
| C(23)-C(27)-C(26) | 108.3(3) |
| C(23)-C(27)-C(32) | 124.5(4) |
| C(26)-C(27)-C(32) | 127.1(3) |
| N(1)-C(3)-H(3)    | 111.00   |
| C(4)-C(3)-H(3)    | 111.00   |
| C(11)-C(3)-H(3)   | 111.00   |
| O(1)-C(4)-H(4)    | 108.00   |
| C(3)-C(4)-H(4)    | 108.00   |
| C(17)-C(4)-H(4)   | 108.00   |
| C(5)-C(6)-H(6)    | 121.00   |
| C(7)-C(6)-H(6)    | 121.00   |
| C(6)-C(7)-H(7)    | 120.00   |
| C(8)-C(7)-H(7)    | 120.00   |
| C(7)-C(8)-H(8)    | 119.00   |
| C(9)-C(8)-H(8)    | 119.00   |
| C(8)-C(9)-H(9)    | 120.00   |
| C(10)-C(9)-H(9)   | 120.00   |
| C(11)-C(12)-H(12) | 120.00   |
| C(13)-C(12)-H(12) | 120.00   |
| C(12)-C(13)-H(13) | 120.00   |
| C(14)-C(13)-H(13) | 120.00   |
| C(13)-C(14)-H(14) | 120.00   |
| C(15)-C(14)-H(14) | 120.00   |
| C(14)-C(15)-H(15) | 120.00   |

|                     |        |
|---------------------|--------|
| C(16)-C(15)-H(15)   | 120.00 |
| C(11)-C(16)-H(16)   | 120.00 |
| C(15)-C(16)-H(16)   | 120.00 |
| C(17)-C(18)-H(18)   | 120.00 |
| C(19)-C(18)-H(18)   | 120.00 |
| C(18)-C(19)-H(19)   | 120.00 |
| C(20)-C(19)-H(19)   | 120.00 |
| C(19)-C(20)-H(20)   | 120.00 |
| C(21)-C(20)-H(20)   | 120.00 |
| C(20)-C(21)-H(21)   | 119.00 |
| C(22)-C(21)-H(21)   | 120.00 |
| C(17)-C(22)-H(22)   | 120.00 |
| C(21)-C(22)-H(22)   | 120.00 |
| C(23)-C(28)-H(28A)  | 109.00 |
| C(23)-C(28)-H(28B)  | 109.00 |
| C(23)-C(28)-H(28C)  | 109.00 |
| H(28A)-C(28)-H(28B) | 109.00 |
| H(28A)-C(28)-H(28C) | 110.00 |
| H(28B)-C(28)-H(28C) | 110.00 |
| C(24)-C(29)-H(29A)  | 109.00 |
| C(24)-C(29)-H(29B)  | 109.00 |
| C(24)-C(29)-H(29C)  | 109.00 |
| H(29A)-C(29)-H(29B) | 109.00 |
| H(29A)-C(29)-H(29C) | 109.00 |
| H(29B)-C(29)-H(29C) | 110.00 |
| C(25)-C(30)-H(30A)  | 110.00 |
| C(25)-C(30)-H(30B)  | 109.00 |
| C(25)-C(30)-H(30C)  | 110.00 |
| H(30A)-C(30)-H(30B) | 109.00 |
| H(30A)-C(30)-H(30C) | 109.00 |
| H(30B)-C(30)-H(30C) | 109.00 |
| C(26)-C(31)-H(31A)  | 109.00 |
| C(26)-C(31)-H(31B)  | 109.00 |
| C(26)-C(31)-H(31C)  | 109.00 |
| H(31A)-C(31)-H(31B) | 109.00 |
| H(31A)-C(31)-H(31C) | 109.00 |
| H(31B)-C(31)-H(31C) | 110.00 |
| C(27)-C(32)-H(32A)  | 109.00 |
| C(27)-C(32)-H(32B)  | 109.00 |

|                     |        |
|---------------------|--------|
| C(27)-C(32)-H(32C)  | 109.00 |
| H(32A)-C(32)-H(32B) | 109.00 |
| H(32A)-C(32)-H(32C) | 109.00 |
| H(32B)-C(32)-H(32C) | 110.00 |

---

Table 4. Anisotropic displacement parameters ( $\text{\AA}^2 \times 10^3$ ) for **1**. The anisotropic displacement factor exponent takes the form:  $-2\pi^2 [ h^2 a^{*2} U^{11} + \dots + 2 h k a^* b^* U^{12} ]$

|       | $U^{11}$ | $U^{22}$ | $U^{33}$ | $U^{23}$ | $U^{13}$ | $U^{12}$ |
|-------|----------|----------|----------|----------|----------|----------|
| Ir(1) | 10(1)    | 10(1)    | 9(1)     | 0(1)     | 6(1)     | 1(1)     |
| Cl(1) | 16(1)    | 16(1)    | 12(1)    | -2(1)    | 9(1)     | 0(1)     |
| O(1)  | 10(1)    | 15(2)    | 16(2)    | 0(1)     | 6(1)     | 1(1)     |
| N(1)  | 11(1)    | 14(1)    | 11(1)    | 2(2)     | 6(1)     | -2(2)    |
| C(2)  | 10(2)    | 21(2)    | 9(2)     | 1(2)     | 5(2)     | -1(2)    |
| C(3)  | 12(2)    | 7(2)     | 10(2)    | -2(2)    | 7(2)     | -1(2)    |
| C(4)  | 13(2)    | 14(3)    | 8(2)     | 0(2)     | 5(1)     | 1(2)     |
| C(5)  | 14(2)    | 13(2)    | 10(2)    | -2(1)    | 7(2)     | 0(1)     |
| C(6)  | 18(2)    | 15(2)    | 15(2)    | 0(2)     | 8(2)     | 4(2)     |
| C(7)  | 24(2)    | 10(2)    | 12(2)    | 2(1)     | 10(2)    | 3(2)     |
| C(8)  | 19(2)    | 13(2)    | 15(2)    | -3(2)    | 11(2)    | -3(2)    |
| C(9)  | 15(2)    | 17(2)    | 13(2)    | 0(2)     | 9(2)     | 2(2)     |
| C(10) | 17(2)    | 10(2)    | 10(2)    | 1(1)     | 10(2)    | 0(2)     |
| C(11) | 8(2)     | 22(2)    | 8(2)     | 0(2)     | 3(2)     | 1(2)     |
| C(12) | 17(2)    | 21(2)    | 13(2)    | 0(2)     | 8(2)     | 3(2)     |
| C(13) | 20(2)    | 35(3)    | 12(2)    | 4(2)     | 10(2)    | 1(2)     |
| C(14) | 24(2)    | 38(3)    | 18(2)    | -10(2)   | 12(2)    | -2(2)    |
| C(15) | 32(3)    | 25(2)    | 26(3)    | -13(2)   | 19(2)    | -10(2)   |
| C(16) | 21(2)    | 20(2)    | 17(2)    | -4(2)    | 11(2)    | -7(2)    |
| C(17) | 13(2)    | 18(2)    | 10(2)    | -2(1)    | 9(2)     | -1(1)    |
| C(18) | 20(2)    | 22(2)    | 12(2)    | 0(1)     | 9(2)     | 1(1)     |
| C(19) | 16(2)    | 31(2)    | 11(2)    | 1(3)     | 5(1)     | 4(3)     |
| C(20) | 14(2)    | 41(3)    | 11(2)    | -8(2)    | 6(2)     | -4(2)    |
| C(21) | 22(2)    | 21(2)    | 18(2)    | -7(2)    | 13(2)    | -5(2)    |
| C(22) | 13(2)    | 22(2)    | 15(2)    | 1(2)     | 9(2)     | 0(2)     |
| C(23) | 9(2)     | 16(2)    | 11(2)    | 3(1)     | 7(2)     | 4(1)     |
| C(24) | 14(2)    | 14(2)    | 12(2)    | 2(2)     | 8(2)     | 6(2)     |
| C(25) | 11(2)    | 15(2)    | 16(2)    | 0(2)     | 8(2)     | 6(2)     |
| C(26) | 9(2)     | 17(3)    | 17(2)    | 2(1)     | 6(2)     | 3(1)     |
| C(27) | 7(2)     | 10(3)    | 17(2)    | 1(1)     | 6(1)     | 3(1)     |
| C(28) | 17(2)    | 22(2)    | 12(2)    | -3(2)    | 9(2)     | 0(2)     |
| C(29) | 21(2)    | 13(2)    | 22(2)    | 3(2)     | 12(2)    | -1(2)    |
| C(30) | 23(2)    | 17(2)    | 16(2)    | 5(2)     | 12(2)    | 7(2)     |
| C(31) | 14(2)    | 25(2)    | 18(2)    | -4(2)    | 8(2)     | 2(2)     |

C(32)    19(2)    17(2)    18(2)    0(2)    12(2)    -2(2)

---

Table 5. Hydrogen coordinates ( $\times 10^4$ ) and isotropic displacement parameters ( $\text{\AA}^2 \times 10^3$ ) for **1**.

|        | x     | y     | z     | U(eq) |
|--------|-------|-------|-------|-------|
| H(3)   | 4358  | 287   | 3672  | 24(8) |
| H(4)   | 2985  | 1643  | 3833  | 24(8) |
| H(6)   | 4074  | 5185  | 2938  | 15(5) |
| H(7)   | 5620  | 6707  | 3393  | 15(5) |
| H(8)   | 7922  | 6279  | 4354  | 15(5) |
| H(9)   | 8711  | 4371  | 4901  | 15(5) |
| H(12)  | 4114  | 2083  | 962   | 22(6) |
| H(13)  | 3826  | 1374  | -1055 | 22(6) |
| H(14)  | 3510  | -610  | -1537 | 22(6) |
| H(15)  | 3408  | -1902 | -16   | 22(6) |
| H(16)  | 3680  | -1201 | 2008  | 22(6) |
| H(18)  | 1041  | 2975  | 967   | 24(6) |
| H(19)  | -1197 | 2510  | -562  | 24(6) |
| H(20)  | -2029 | 643   | -551  | 24(6) |
| H(21)  | -632  | -742  | 989   | 24(6) |
| H(22)  | 1601  | -288  | 2531  | 24(6) |
| H(28A) | 7170  | 1111  | 1651  | 27(7) |
| H(28B) | 6421  | 48    | 1921  | 27(7) |
| H(28C) | 7861  | -152  | 2019  | 27(7) |
| H(29A) | 7673  | -1760 | 4459  | 31(4) |
| H(29B) | 6322  | -1027 | 3587  | 31(4) |
| H(29C) | 6914  | -1151 | 5160  | 31(4) |
| H(30A) | 8540  | -508  | 7168  | 31(4) |
| H(30B) | 9171  | 741   | 7782  | 31(4) |
| H(30C) | 10106 | -261  | 7691  | 31(4) |
| H(31A) | 11380 | 1929  | 7150  | 31(4) |
| H(31B) | 10245 | 2434  | 7453  | 31(4) |
| H(31C) | 10552 | 3075  | 6394  | 31(4) |
| H(32A) | 9763  | 3180  | 4081  | 31(4) |
| H(32B) | 8598  | 2695  | 2686  | 31(4) |
| H(32C) | 10062 | 2106  | 3374  | 31(4) |



Table 6. Torsion angles [°] for **1**.

---

|                         |           |
|-------------------------|-----------|
| Cl(1)-Ir(1)-N(1)-C(2)   | 73.1(3)   |
| Cl(1)-Ir(1)-N(1)-C(3)   | -103.7(3) |
| C(10)-Ir(1)-N(1)-C(2)   | -11.0(3)  |
| C(10)-Ir(1)-N(1)-C(3)   | 172.2(3)  |
| C(23)-Ir(1)-N(1)-C(2)   | -131.3(3) |
| C(23)-Ir(1)-N(1)-C(3)   | 52.0(3)   |
| C(24)-Ir(1)-N(1)-C(2)   | -171.4(3) |
| C(24)-Ir(1)-N(1)-C(3)   | 11.8(3)   |
| C(25)-Ir(1)-N(1)-C(2)   | 160.7(3)  |
| C(25)-Ir(1)-N(1)-C(3)   | -16.1(4)  |
| C(27)-Ir(1)-N(1)-C(2)   | -101.7(3) |
| C(27)-Ir(1)-N(1)-C(3)   | 81.5(4)   |
| Cl(1)-Ir(1)-C(10)-C(5)  | -77.3(3)  |
| Cl(1)-Ir(1)-C(10)-C(9)  | 95.5(4)   |
| N(1)-Ir(1)-C(10)-C(5)   | 9.1(3)    |
| N(1)-Ir(1)-C(10)-C(9)   | -178.1(4) |
| C(23)-Ir(1)-C(10)-C(5)  | 109.8(3)  |
| C(23)-Ir(1)-C(10)-C(9)  | -77.4(4)  |
| C(25)-Ir(1)-C(10)-C(5)  | -159.7(3) |
| C(25)-Ir(1)-C(10)-C(9)  | 13.1(6)   |
| C(26)-Ir(1)-C(10)-C(5)  | -176.7(3) |
| C(26)-Ir(1)-C(10)-C(9)  | -3.9(4)   |
| C(27)-Ir(1)-C(10)-C(5)  | 144.3(3)  |
| C(27)-Ir(1)-C(10)-C(9)  | -42.9(4)  |
| Cl(1)-Ir(1)-C(23)-C(24) | 15.1(4)   |
| Cl(1)-Ir(1)-C(23)-C(27) | -101.3(3) |
| Cl(1)-Ir(1)-C(23)-C(28) | 137.8(3)  |
| N(1)-Ir(1)-C(23)-C(24)  | -96.5(3)  |
| N(1)-Ir(1)-C(23)-C(27)  | 147.1(2)  |
| N(1)-Ir(1)-C(23)-C(28)  | 26.2(4)   |
| C(10)-Ir(1)-C(23)-C(24) | 178.9(3)  |
| C(10)-Ir(1)-C(23)-C(27) | 62.4(3)   |
| C(10)-Ir(1)-C(23)-C(28) | -58.5(4)  |
| C(24)-Ir(1)-C(23)-C(27) | -116.4(3) |
| C(24)-Ir(1)-C(23)-C(28) | 122.7(5)  |
| C(25)-Ir(1)-C(23)-C(24) | 35.5(3)   |
| C(25)-Ir(1)-C(23)-C(27) | -80.9(2)  |

|                         |           |
|-------------------------|-----------|
| C(25)-Ir(1)-C(23)-C(28) | 158.2(4)  |
| C(26)-Ir(1)-C(23)-C(24) | 78.9(3)   |
| C(26)-Ir(1)-C(23)-C(27) | -37.5(2)  |
| C(26)-Ir(1)-C(23)-C(28) | -158.4(4) |
| C(27)-Ir(1)-C(23)-C(24) | 116.4(3)  |
| C(27)-Ir(1)-C(23)-C(28) | -120.9(5) |
| Cl(1)-Ir(1)-C(24)-C(23) | -172.6(2) |
| Cl(1)-Ir(1)-C(24)-C(25) | -53.4(3)  |
| Cl(1)-Ir(1)-C(24)-C(29) | 69.0(4)   |
| N(1)-Ir(1)-C(24)-C(23)  | 95.0(3)   |
| N(1)-Ir(1)-C(24)-C(25)  | -145.7(3) |
| N(1)-Ir(1)-C(24)-C(29)  | -23.3(4)  |
| C(23)-Ir(1)-C(24)-C(25) | 119.2(4)  |
| C(23)-Ir(1)-C(24)-C(29) | -118.3(4) |
| C(25)-Ir(1)-C(24)-C(23) | -119.2(4) |
| C(25)-Ir(1)-C(24)-C(29) | 122.4(5)  |
| C(26)-Ir(1)-C(24)-C(23) | -82.3(3)  |
| C(26)-Ir(1)-C(24)-C(25) | 36.9(3)   |
| C(26)-Ir(1)-C(24)-C(29) | 159.4(4)  |
| C(27)-Ir(1)-C(24)-C(23) | -38.7(3)  |
| C(27)-Ir(1)-C(24)-C(25) | 80.5(3)   |
| C(27)-Ir(1)-C(24)-C(29) | -157.1(4) |
| Cl(1)-Ir(1)-C(25)-C(24) | 133.7(3)  |
| Cl(1)-Ir(1)-C(25)-C(26) | -105.6(2) |
| Cl(1)-Ir(1)-C(25)-C(30) | 10.2(4)   |
| N(1)-Ir(1)-C(25)-C(24)  | 49.0(3)   |
| N(1)-Ir(1)-C(25)-C(26)  | 169.6(2)  |
| N(1)-Ir(1)-C(25)-C(30)  | -74.5(4)  |
| C(10)-Ir(1)-C(25)-C(24) | -146.3(3) |
| C(10)-Ir(1)-C(25)-C(26) | -25.7(4)  |
| C(10)-Ir(1)-C(25)-C(30) | 90.2(5)   |
| C(23)-Ir(1)-C(25)-C(24) | -37.4(3)  |
| C(23)-Ir(1)-C(25)-C(26) | 83.2(3)   |
| C(23)-Ir(1)-C(25)-C(30) | -160.9(4) |
| C(24)-Ir(1)-C(25)-C(26) | 120.7(4)  |
| C(24)-Ir(1)-C(25)-C(30) | -123.5(5) |
| C(26)-Ir(1)-C(25)-C(24) | -120.7(4) |
| C(26)-Ir(1)-C(25)-C(30) | 115.8(4)  |
| C(27)-Ir(1)-C(25)-C(24) | -81.2(3)  |

|                         |             |
|-------------------------|-------------|
| C(27)-Ir(1)-C(25)-C(26) | 39.5(2)     |
| C(27)-Ir(1)-C(25)-C(30) | 155.4(4)    |
| Cl(1)-Ir(1)-C(26)-C(25) | 78.8(2)     |
| Cl(1)-Ir(1)-C(26)-C(27) | -166.37(18) |
| Cl(1)-Ir(1)-C(26)-C(31) | -41.8(4)    |
| C(10)-Ir(1)-C(26)-C(25) | 165.7(2)    |
| C(10)-Ir(1)-C(26)-C(27) | -79.5(2)    |
| C(10)-Ir(1)-C(26)-C(31) | 45.1(4)     |
| C(23)-Ir(1)-C(26)-C(25) | -77.4(2)    |
| C(23)-Ir(1)-C(26)-C(27) | 37.5(2)     |
| C(23)-Ir(1)-C(26)-C(31) | 162.0(4)    |
| C(24)-Ir(1)-C(26)-C(25) | -34.6(2)    |
| C(24)-Ir(1)-C(26)-C(27) | 80.2(2)     |
| C(24)-Ir(1)-C(26)-C(31) | -155.3(4)   |
| C(25)-Ir(1)-C(26)-C(27) | 114.8(3)    |
| C(25)-Ir(1)-C(26)-C(31) | -120.6(5)   |
| C(27)-Ir(1)-C(26)-C(25) | -114.8(3)   |
| C(27)-Ir(1)-C(26)-C(31) | 124.6(4)    |
| Cl(1)-Ir(1)-C(27)-C(23) | 138.96(19)  |
| Cl(1)-Ir(1)-C(27)-C(26) | 20.5(3)     |
| Cl(1)-Ir(1)-C(27)-C(32) | -101.8(3)   |
| N(1)-Ir(1)-C(27)-C(23)  | -48.8(3)    |
| N(1)-Ir(1)-C(27)-C(26)  | -167.3(3)   |
| N(1)-Ir(1)-C(27)-C(32)  | 70.4(4)     |
| C(10)-Ir(1)-C(27)-C(23) | -130.5(2)   |
| C(10)-Ir(1)-C(27)-C(26) | 111.1(2)    |
| C(10)-Ir(1)-C(27)-C(32) | -11.2(4)    |
| C(23)-Ir(1)-C(27)-C(26) | -118.5(3)   |
| C(23)-Ir(1)-C(27)-C(32) | 119.3(4)    |
| C(24)-Ir(1)-C(27)-C(23) | 38.2(2)     |
| C(24)-Ir(1)-C(27)-C(26) | -80.2(2)    |
| C(24)-Ir(1)-C(27)-C(32) | 157.5(4)    |
| C(25)-Ir(1)-C(27)-C(23) | 79.0(2)     |
| C(25)-Ir(1)-C(27)-C(26) | -39.4(2)    |
| C(25)-Ir(1)-C(27)-C(32) | -161.7(4)   |
| C(26)-Ir(1)-C(27)-C(23) | 118.5(3)    |
| C(26)-Ir(1)-C(27)-C(32) | -122.3(4)   |
| C(4)-O(1)-C(2)-N(1)     | 13.1(5)     |
| C(4)-O(1)-C(2)-C(5)     | -169.5(4)   |

|                         |           |
|-------------------------|-----------|
| C(2)-O(1)-C(4)-C(17)    | -153.8(4) |
| C(2)-O(1)-C(4)-C(3)     | -25.3(4)  |
| C(3)-N(1)-C(2)-O(1)     | 6.3(5)    |
| Ir(1)-N(1)-C(2)-O(1)    | -171.4(3) |
| C(2)-N(1)-C(3)-C(11)    | 99.3(4)   |
| Ir(1)-N(1)-C(2)-C(5)    | 11.2(5)   |
| C(3)-N(1)-C(2)-C(5)     | -171.2(4) |
| Ir(1)-N(1)-C(3)-C(11)   | -83.8(4)  |
| Ir(1)-N(1)-C(3)-C(4)    | 155.7(2)  |
| C(2)-N(1)-C(3)-C(4)     | -21.3(4)  |
| N(1)-C(2)-C(5)-C(10)    | -3.2(6)   |
| O(1)-C(2)-C(5)-C(6)     | -0.5(7)   |
| O(1)-C(2)-C(5)-C(10)    | 179.5(4)  |
| N(1)-C(2)-C(5)-C(6)     | 176.9(4)  |
| N(1)-C(3)-C(4)-O(1)     | 27.6(3)   |
| C(11)-C(3)-C(4)-C(17)   | 33.5(5)   |
| N(1)-C(3)-C(11)-C(12)   | -39.5(6)  |
| N(1)-C(3)-C(11)-C(16)   | 139.5(5)  |
| C(4)-C(3)-C(11)-C(12)   | 71.2(6)   |
| C(4)-C(3)-C(11)-C(16)   | -109.9(5) |
| N(1)-C(3)-C(4)-C(17)    | 150.9(3)  |
| C(11)-C(3)-C(4)-O(1)    | -89.8(4)  |
| O(1)-C(4)-C(17)-C(18)   | -3.6(6)   |
| O(1)-C(4)-C(17)-C(22)   | 179.4(4)  |
| C(3)-C(4)-C(17)-C(18)   | -123.1(5) |
| C(3)-C(4)-C(17)-C(22)   | 59.9(5)   |
| C(2)-C(5)-C(6)-C(7)     | -178.4(4) |
| C(10)-C(5)-C(6)-C(7)    | 1.6(6)    |
| C(2)-C(5)-C(10)-Ir(1)   | -6.5(5)   |
| C(2)-C(5)-C(10)-C(9)    | 179.8(4)  |
| C(6)-C(5)-C(10)-Ir(1)   | 173.5(3)  |
| C(6)-C(5)-C(10)-C(9)    | -0.2(6)   |
| C(5)-C(6)-C(7)-C(8)     | -1.2(6)   |
| C(6)-C(7)-C(8)-C(9)     | -0.6(6)   |
| C(7)-C(8)-C(9)-C(10)    | 2.1(6)    |
| C(8)-C(9)-C(10)-Ir(1)   | -174.3(3) |
| C(8)-C(9)-C(10)-C(5)    | -1.6(6)   |
| C(3)-C(11)-C(12)-C(13)  | 178.9(5)  |
| C(16)-C(11)-C(12)-C(13) | -0.1(7)   |

|                         |           |
|-------------------------|-----------|
| C(3)-C(11)-C(16)-C(15)  | -178.6(5) |
| C(12)-C(11)-C(16)-C(15) | 0.4(7)    |
| C(11)-C(12)-C(13)-C(14) | -0.6(7)   |
| C(12)-C(13)-C(14)-C(15) | 1.1(8)    |
| C(13)-C(14)-C(15)-C(16) | -0.8(8)   |
| C(14)-C(15)-C(16)-C(11) | 0.0(8)    |
| C(4)-C(17)-C(18)-C(19)  | -176.3(4) |
| C(22)-C(17)-C(18)-C(19) | 0.7(7)    |
| C(4)-C(17)-C(22)-C(21)  | 176.7(4)  |
| C(18)-C(17)-C(22)-C(21) | -0.4(7)   |
| C(17)-C(18)-C(19)-C(20) | -0.6(7)   |
| C(18)-C(19)-C(20)-C(21) | 0.3(7)    |
| C(19)-C(20)-C(21)-C(22) | 0.0(7)    |
| C(20)-C(21)-C(22)-C(17) | 0.0(7)    |
| Ir(1)-C(23)-C(24)-C(25) | -60.7(3)  |
| Ir(1)-C(23)-C(24)-C(29) | 120.2(5)  |
| C(27)-C(23)-C(24)-Ir(1) | 62.3(3)   |
| C(27)-C(23)-C(24)-C(25) | 1.7(5)    |
| C(27)-C(23)-C(24)-C(29) | -177.4(4) |
| C(28)-C(23)-C(24)-Ir(1) | -127.6(5) |
| C(28)-C(23)-C(24)-C(25) | 171.7(4)  |
| C(28)-C(23)-C(24)-C(29) | -7.4(8)   |
| Ir(1)-C(23)-C(27)-C(26) | 60.8(3)   |
| Ir(1)-C(23)-C(27)-C(32) | -122.6(4) |
| C(24)-C(23)-C(27)-Ir(1) | -64.9(3)  |
| C(24)-C(23)-C(27)-C(26) | -4.1(5)   |
| C(24)-C(23)-C(27)-C(32) | 172.4(4)  |
| C(28)-C(23)-C(27)-Ir(1) | 125.1(4)  |
| C(28)-C(23)-C(27)-C(26) | -174.1(4) |
| C(28)-C(23)-C(27)-C(32) | 2.5(7)    |
| Ir(1)-C(24)-C(25)-C(26) | -56.4(3)  |
| Ir(1)-C(24)-C(25)-C(30) | 122.5(5)  |
| C(23)-C(24)-C(25)-Ir(1) | 57.8(3)   |
| C(23)-C(24)-C(25)-C(26) | 1.4(5)    |
| C(23)-C(24)-C(25)-C(30) | -179.7(4) |
| C(29)-C(24)-C(25)-Ir(1) | -123.1(5) |
| C(29)-C(24)-C(25)-C(26) | -179.5(5) |
| C(29)-C(24)-C(25)-C(30) | -0.6(8)   |
| Ir(1)-C(25)-C(26)-C(27) | -63.3(3)  |

|                         |           |
|-------------------------|-----------|
| Ir(1)-C(25)-C(26)-C(31) | 122.3(5)  |
| C(24)-C(25)-C(26)-Ir(1) | 59.4(3)   |
| C(24)-C(25)-C(26)-C(27) | -3.9(5)   |
| C(24)-C(25)-C(26)-C(31) | -178.3(4) |
| C(30)-C(25)-C(26)-Ir(1) | -119.5(4) |
| C(30)-C(25)-C(26)-C(27) | 177.2(4)  |
| C(30)-C(25)-C(26)-C(31) | 2.8(7)    |
| Ir(1)-C(26)-C(27)-C(23) | -61.0(3)  |
| Ir(1)-C(26)-C(27)-C(32) | 122.5(4)  |
| C(25)-C(26)-C(27)-Ir(1) | 65.9(3)   |
| C(25)-C(26)-C(27)-C(23) | 4.9(5)    |
| C(25)-C(26)-C(27)-C(32) | -171.5(4) |
| C(31)-C(26)-C(27)-Ir(1) | -120.1(5) |
| C(31)-C(26)-C(27)-C(23) | 178.9(4)  |
| C(31)-C(26)-C(27)-C(32) | 2.4(7)    |

Table 7. Hydrogen bonds for **1** [ $\text{\AA}$  and  $^\circ$ ].

| D-H...A               | d(D-H) | d(H...A) | d(D...A) | $\angle(\text{DHA})$ |
|-----------------------|--------|----------|----------|----------------------|
| C(16)-H(16)...Cl(1)#1 | 0.9500 | 2.7100   | 3.642(5) | 168.00               |
| C(18)-H(18)...O(1)    | 0.9500 | 2.3900   | 2.765(6) | 103.00               |

Symmetry transformations used to generate equivalent atoms:

#1  $-x+1, y-1/2, -z+1$

## Crystallographic data of complex 2

CCDC number: CCDC 2031297

$[\text{Ir}(\text{Cl})(2R,3R\text{-C}_{21}\text{H}_{16}\text{ON})(\text{C}_{10}\text{H}_{15})]$

$M = 661.22$

orange prism,

$0.35 \times 0.25 \times 0.10 \text{ mm}^3$

orthorhombic,

space group  $P2_12_12_1$  (No. 19)

$a = 7.7357(5) \text{ \AA}$

$b = 14.3256(9) \text{ \AA}$

$c = 22.7397(14) \text{ \AA}$

$V = 2520.0(3) \text{ \AA}^3$

$Z = 4$

$D_c = 1.743 \text{ g/cm}^3$

$T = 100(2) \text{ K}$

$2\theta_{\text{max}} = 56.6^\circ$

19464 reflections collected,

6247 unique

Numerical absorption correction

$R_{\text{int}} = 0.0210$

Final  $Goof = 0.748$

$RI = 0.0197$

$wR2 = 0.0442$

327 parameters, 1 restraint

Flack parameter = 0.013(5)

$\mu = 5.236 \text{ mm}^{-1}$

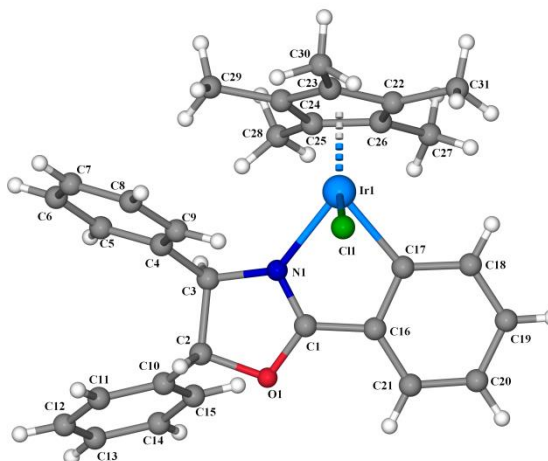

### Data collection, structure solution and refinement

The crystals were large, good quality orange prisms. A suitably sized crystal with well defined habit was selected for the analysis. The crystal was mounted on a glass fibre and placed in a cold stream at 100K. Single crystal X-ray data were collected on a Bruker D8 diffractometer with an APEX CCD detector, and 1.5 kW graphite monochromated Mo radiation. The detector to crystal distance was 5.985 cm. Exposure times of 10 s per frame and scan widths of 0.3° were used throughout the data collection. The faces of the crystal were indexed, and the distances of the faces from the centre of the crystal were measured for a numerical absorption correction. The data collection was performed using three  $\omega$  scans with different  $\varphi$  values yielding data in the  $\theta$  range 1.68 to 28.3° with an average completeness of 99.7%. The frames were integrated with the SAINT v7.45a (Bruker, 2005).<sup>5</sup> A numerical absorption correction based on the size and shape of the crystal was carried out using the program SADABS V2008-1 (Bruker, 2008)<sup>6</sup>.

The structure was solved and refined with X-SEED,<sup>7</sup> a graphical interface to SHELX (Sheldrick, 2008).<sup>8</sup> The hydrogen atoms were located from difference maps and were refined with a mixture of constraints and restraints. In the final cycles of refinement all non-hydrogen atoms were refined anisotropically.

Table 1. Crystal data and structure refinement for **2**.

- 
- <sup>5</sup> Bruker (2009). SAINT V7.68a, BRUKER AXS Inc., Madison, WI, USA.
- <sup>6</sup> Bruker (2008), SADABS V2008-1, BRUKER AXS Inc., Madison, WI, USA.
- <sup>7</sup> Barbour, L. J. "X-Seed – A software tool for supramolecular crystallography" *J. Supramol. Chem.* **2001**, *1*, 189-191.
- <sup>8</sup> Sheldrick, G.M. (2008). *Acta Cryst.* A64, 112-122.



|                                   |                                             |          |
|-----------------------------------|---------------------------------------------|----------|
| Identification code               | <b>2</b>                                    |          |
| Empirical formula                 | C <sub>31</sub> H <sub>31</sub> Cl Ir N O   |          |
| Formula weight                    | 661.22                                      |          |
| Temperature                       | 100(2) K                                    |          |
| Wavelength                        | 0.71073 Å                                   |          |
| Crystal system                    | Orthorhombic                                |          |
| Space group                       | P212121                                     |          |
| Unit cell dimensions              | a = 7.7357(5) Å                             | α = 90°. |
|                                   | b = 14.3256(9) Å                            | β = 90°. |
|                                   | c = 22.7397(14) Å                           | γ = 90°. |
| Volume                            | 2520.0(3) Å <sup>3</sup>                    |          |
| Z                                 | 4                                           |          |
| Density (calculated)              | 1.743 Mg/m <sup>3</sup>                     |          |
| Absorption coefficient            | 5.430 mm <sup>-1</sup>                      |          |
| F(000)                            | 1304                                        |          |
| Crystal size                      | 0.35 x 0.25 x 0.10 mm <sup>3</sup>          |          |
| Theta range for data collection   | 1.68 to 28.28°.                             |          |
| Index ranges                      | -9 ≤ h ≤ 10, -19 ≤ k ≤ 19, -27 ≤ l ≤ 30     |          |
| Reflections collected             | 19464                                       |          |
| Independent reflections           | 6247 [R(int) = 0.0216]                      |          |
| Completeness to theta = 28.28°    | 99.7 %                                      |          |
| Absorption correction             | Gaussian                                    |          |
| Max. and min. transmission        | 0.6128 and 0.2523                           |          |
| Refinement method                 | Full-matrix least-squares on F <sup>2</sup> |          |
| Data / restraints / parameters    | 6247 / 0 / 352                              |          |
| Goodness-of-fit on F <sup>2</sup> | 1.028                                       |          |
| Final R indices [I > 2σ(I)]       | R1 = 0.0146, wR2 = 0.0332                   |          |
| R indices (all data)              | R1 = 0.0154, wR2 = 0.0334                   |          |
| Absolute structure parameter      | -0.013(4)                                   |          |
| Largest diff. peak and hole       | 0.788 and -0.396 e.Å <sup>-3</sup>          |          |

Table 2. Atomic coordinates ( $\times 10^4$ ) and equivalent isotropic displacement parameters ( $\text{\AA}^2 \times 10^3$ ) for **2**.  $U(\text{eq})$  is defined as one third of the trace of the orthogonalized  $U^{\text{ij}}$  tensor.

|       | x       | y        | z       | $U(\text{eq})$ |
|-------|---------|----------|---------|----------------|
| Ir(1) | 5407(1) | 588(1)   | 1130(1) | 10(1)          |
| Cl(1) | 8237(1) | 819(1)   | 716(1)  | 15(1)          |
| O(1)  | 8225(2) | 103(1)   | 2665(1) | 16(1)          |
| N(1)  | 6584(2) | 751(1)   | 1957(1) | 12(1)          |
| C(1)  | 7430(3) | 31(2)    | 2142(1) | 13(1)          |
| C(2)  | 7956(3) | 1068(2)  | 2860(1) | 15(1)          |
| C(3)  | 6575(3) | 1459(2)  | 2426(1) | 12(1)          |
| C(4)  | 6949(3) | 2444(2)  | 2233(1) | 13(1)          |
| C(5)  | 6285(3) | 3178(2)  | 2571(1) | 17(1)          |
| C(6)  | 6623(3) | 4092(2)  | 2416(1) | 19(1)          |
| C(7)  | 7643(3) | 4293(2)  | 1928(1) | 20(1)          |
| C(8)  | 8309(3) | 3563(2)  | 1596(1) | 19(1)          |
| C(9)  | 7949(3) | 2641(2)  | 1742(1) | 15(1)          |
| C(10) | 7468(3) | 1073(2)  | 3500(1) | 15(1)          |
| C(11) | 8018(3) | 1798(2)  | 3861(1) | 17(1)          |
| C(12) | 7557(3) | 1814(2)  | 4450(1) | 19(1)          |
| C(13) | 6567(3) | 1092(2)  | 4688(1) | 22(1)          |
| C(14) | 6020(4) | 373(2)   | 4331(1) | 23(1)          |
| C(15) | 6445(3) | 360(2)   | 3738(1) | 19(1)          |
| C(16) | 7351(3) | -827(2)  | 1811(1) | 13(1)          |
| C(17) | 6299(3) | -739(2)  | 1307(1) | 13(1)          |
| C(18) | 6040(3) | -1558(2) | 982(1)  | 14(1)          |
| C(19) | 6772(3) | -2402(2) | 1157(1) | 17(1)          |
| C(20) | 7799(3) | -2457(2) | 1659(1) | 18(1)          |
| C(21) | 8120(3) | -1659(2) | 1986(1) | 17(1)          |
| C(22) | 3748(3) | 528(2)   | 374(1)  | 15(1)          |
| C(23) | 4200(3) | 1509(2)  | 454(1)  | 17(1)          |
| C(24) | 3590(3) | 1810(2)  | 1006(1) | 17(1)          |
| C(25) | 2764(3) | 1018(2)  | 1290(1) | 15(1)          |
| C(26) | 2791(3) | 247(2)   | 887(1)  | 15(1)          |
| C(27) | 1890(3) | -663(2)  | 983(1)  | 20(1)          |
| C(28) | 1805(3) | 1072(2)  | 1861(1) | 23(1)          |
| C(29) | 3643(4) | 2788(2)  | 1244(1) | 23(1)          |
| C(30) | 5162(4) | 2087(2)  | 15(1)   | 24(1)          |

C(31)

3977(4)

-20(2)

-182(1)

22(1)

---

Table 3. Bond lengths [Å] and angles [°] for **2**.

---

|             |            |
|-------------|------------|
| Ir(1)-Cl(1) | 2.4056(6)  |
| Ir(1)-N(1)  | 2.1011(18) |
| Ir(1)-C(17) | 2.062(2)   |
| Ir(1)-C(22) | 2.148(2)   |
| Ir(1)-C(23) | 2.232(2)   |
| Ir(1)-C(24) | 2.263(2)   |
| Ir(1)-C(25) | 2.166(2)   |
| Ir(1)-C(26) | 2.154(2)   |
| O(1)-C(1)   | 1.344(3)   |
| O(1)-C(2)   | 1.466(3)   |
| N(1)-C(1)   | 1.292(3)   |
| N(1)-C(3)   | 1.471(3)   |
| C(1)-C(16)  | 1.443(3)   |
| C(2)-C(3)   | 1.558(3)   |
| C(2)-C(10)  | 1.505(4)   |
| C(3)-C(4)   | 1.505(3)   |
| C(4)-C(5)   | 1.401(3)   |
| C(4)-C(9)   | 1.388(3)   |
| C(5)-C(6)   | 1.381(3)   |
| C(6)-C(7)   | 1.393(4)   |
| C(7)-C(8)   | 1.388(4)   |
| C(8)-C(9)   | 1.390(3)   |
| C(10)-C(11) | 1.391(3)   |
| C(10)-C(15) | 1.401(3)   |
| C(11)-C(12) | 1.386(4)   |
| C(12)-C(13) | 1.396(4)   |
| C(13)-C(14) | 1.377(4)   |
| C(14)-C(15) | 1.389(4)   |
| C(16)-C(17) | 1.411(3)   |
| C(16)-C(21) | 1.390(3)   |
| C(17)-C(18) | 1.401(3)   |
| C(18)-C(19) | 1.394(3)   |
| C(19)-C(20) | 1.392(4)   |
| C(20)-C(21) | 1.388(4)   |
| C(22)-C(23) | 1.461(4)   |
| C(22)-C(26) | 1.440(3)   |
| C(22)-C(31) | 1.498(4)   |

|              |          |
|--------------|----------|
| C(23)-C(24)  | 1.409(4) |
| C(23)-C(30)  | 1.495(4) |
| C(24)-C(25)  | 1.453(3) |
| C(24)-C(29)  | 1.502(4) |
| C(25)-C(26)  | 1.435(3) |
| C(25)-C(28)  | 1.499(4) |
| C(26)-C(27)  | 1.494(3) |
| C(2)-H(2)    | 1.0000   |
| C(3)-H(3)    | 1.0000   |
| C(5)-H(5)    | 0.9500   |
| C(6)-H(6)    | 0.9500   |
| C(7)-H(7)    | 0.9500   |
| C(8)-H(8)    | 0.9500   |
| C(9)-H(9)    | 0.9500   |
| C(11)-H(11)  | 0.9500   |
| C(12)-H(12)  | 0.9500   |
| C(13)-H(13)  | 0.9500   |
| C(14)-H(14)  | 0.9500   |
| C(15)-H(15)  | 0.9500   |
| C(18)-H(18)  | 0.9500   |
| C(19)-H(19)  | 0.9500   |
| C(20)-H(20)  | 0.9500   |
| C(21)-H(21)  | 0.9500   |
| C(27)-H(27A) | 0.9800   |
| C(27)-H(27B) | 0.9800   |
| C(27)-H(27C) | 0.9800   |
| C(28)-H(28A) | 0.9800   |
| C(28)-H(28B) | 0.9800   |
| C(28)-H(28C) | 0.9800   |
| C(29)-H(29A) | 0.9800   |
| C(29)-H(29B) | 0.9800   |
| C(29)-H(29C) | 0.9800   |
| C(30)-H(30A) | 0.9800   |
| C(30)-H(30B) | 0.9800   |
| C(30)-H(30C) | 0.9800   |
| C(31)-H(31A) | 0.9800   |
| C(31)-H(31B) | 0.9800   |
| C(31)-H(31C) | 0.9800   |

|                   |            |
|-------------------|------------|
| Cl(1)-Ir(1)-N(1)  | 86.58(5)   |
| Cl(1)-Ir(1)-C(17) | 84.18(7)   |
| Cl(1)-Ir(1)-C(22) | 103.65(6)  |
| Cl(1)-Ir(1)-C(23) | 91.70(6)   |
| Cl(1)-Ir(1)-C(24) | 114.20(6)  |
| Cl(1)-Ir(1)-C(25) | 152.29(7)  |
| Cl(1)-Ir(1)-C(26) | 141.80(7)  |
| N(1)-Ir(1)-C(17)  | 77.48(8)   |
| N(1)-Ir(1)-C(22)  | 168.42(8)  |
| N(1)-Ir(1)-C(23)  | 137.08(8)  |
| N(1)-Ir(1)-C(24)  | 107.16(8)  |
| N(1)-Ir(1)-C(25)  | 103.16(8)  |
| N(1)-Ir(1)-C(26)  | 131.43(8)  |
| C(17)-Ir(1)-C(22) | 108.57(9)  |
| C(17)-Ir(1)-C(23) | 145.02(9)  |
| C(17)-Ir(1)-C(24) | 160.99(9)  |
| C(17)-Ir(1)-C(25) | 123.06(9)  |
| C(17)-Ir(1)-C(26) | 98.90(9)   |
| C(22)-Ir(1)-C(23) | 38.90(9)   |
| C(22)-Ir(1)-C(24) | 63.91(9)   |
| C(22)-Ir(1)-C(25) | 65.26(9)   |
| C(22)-Ir(1)-C(26) | 39.11(9)   |
| C(23)-Ir(1)-C(24) | 36.54(9)   |
| C(23)-Ir(1)-C(25) | 63.40(9)   |
| C(23)-Ir(1)-C(26) | 64.18(9)   |
| C(24)-Ir(1)-C(25) | 38.23(9)   |
| C(24)-Ir(1)-C(26) | 63.90(9)   |
| C(25)-Ir(1)-C(26) | 38.81(9)   |
| C(1)-O(1)-C(2)    | 105.96(18) |
| Ir(1)-N(1)-C(1)   | 114.98(16) |
| Ir(1)-N(1)-C(3)   | 136.25(14) |
| C(1)-N(1)-C(3)    | 108.46(19) |
| O(1)-C(1)-N(1)    | 117.3(2)   |
| O(1)-C(1)-C(16)   | 123.2(2)   |
| N(1)-C(1)-C(16)   | 119.3(2)   |
| O(1)-C(2)-C(3)    | 104.17(18) |
| O(1)-C(2)-C(10)   | 109.37(19) |
| C(3)-C(2)-C(10)   | 116.08(19) |
| N(1)-C(3)-C(2)    | 102.02(18) |

|                   |            |
|-------------------|------------|
| N(1)-C(3)-C(4)    | 115.75(19) |
| C(2)-C(3)-C(4)    | 112.88(19) |
| C(3)-C(4)-C(5)    | 118.3(2)   |
| C(3)-C(4)-C(9)    | 122.1(2)   |
| C(5)-C(4)-C(9)    | 119.6(2)   |
| C(4)-C(5)-C(6)    | 120.2(2)   |
| C(5)-C(6)-C(7)    | 120.5(2)   |
| C(6)-C(7)-C(8)    | 119.2(2)   |
| C(7)-C(8)-C(9)    | 120.9(2)   |
| C(4)-C(9)-C(8)    | 119.8(2)   |
| C(2)-C(10)-C(11)  | 119.9(2)   |
| C(2)-C(10)-C(15)  | 120.8(2)   |
| C(11)-C(10)-C(15) | 119.3(2)   |
| C(10)-C(11)-C(12) | 120.2(2)   |
| C(11)-C(12)-C(13) | 120.2(2)   |
| C(12)-C(13)-C(14) | 119.6(2)   |
| C(13)-C(14)-C(15) | 120.6(2)   |
| C(10)-C(15)-C(14) | 119.9(2)   |
| C(1)-C(16)-C(17)  | 111.9(2)   |
| C(1)-C(16)-C(21)  | 124.2(2)   |
| C(17)-C(16)-C(21) | 123.8(2)   |
| Ir(1)-C(17)-C(16) | 115.66(16) |
| Ir(1)-C(17)-C(18) | 128.43(17) |
| C(16)-C(17)-C(18) | 115.9(2)   |
| C(17)-C(18)-C(19) | 121.1(2)   |
| C(18)-C(19)-C(20) | 121.0(2)   |
| C(19)-C(20)-C(21) | 119.7(2)   |
| C(16)-C(21)-C(20) | 118.4(2)   |
| Ir(1)-C(22)-C(23) | 73.65(14)  |
| Ir(1)-C(22)-C(26) | 70.68(13)  |
| Ir(1)-C(22)-C(31) | 128.76(18) |
| C(23)-C(22)-C(26) | 106.9(2)   |
| C(23)-C(22)-C(31) | 125.5(2)   |
| C(26)-C(22)-C(31) | 126.8(2)   |
| Ir(1)-C(23)-C(22) | 67.45(13)  |
| Ir(1)-C(23)-C(24) | 72.93(14)  |
| Ir(1)-C(23)-C(30) | 125.41(18) |
| C(22)-C(23)-C(24) | 109.0(2)   |
| C(22)-C(23)-C(30) | 124.7(2)   |

|                   |            |
|-------------------|------------|
| C(24)-C(23)-C(30) | 126.4(2)   |
| Ir(1)-C(24)-C(23) | 70.53(14)  |
| Ir(1)-C(24)-C(25) | 67.28(13)  |
| Ir(1)-C(24)-C(29) | 131.25(18) |
| C(23)-C(24)-C(25) | 107.7(2)   |
| C(23)-C(24)-C(29) | 126.7(2)   |
| C(25)-C(24)-C(29) | 125.4(2)   |
| Ir(1)-C(25)-C(24) | 74.49(13)  |
| Ir(1)-C(25)-C(26) | 70.15(13)  |
| Ir(1)-C(25)-C(28) | 128.84(17) |
| C(24)-C(25)-C(26) | 108.2(2)   |
| C(24)-C(25)-C(28) | 124.2(2)   |
| C(26)-C(25)-C(28) | 126.9(2)   |
| Ir(1)-C(26)-C(22) | 70.21(13)  |
| Ir(1)-C(26)-C(25) | 71.05(13)  |
| Ir(1)-C(26)-C(27) | 126.83(17) |
| C(22)-C(26)-C(25) | 108.0(2)   |
| C(22)-C(26)-C(27) | 127.0(2)   |
| C(25)-C(26)-C(27) | 124.9(2)   |
| O(1)-C(2)-H(2)    | 109.00     |
| C(3)-C(2)-H(2)    | 109.00     |
| C(10)-C(2)-H(2)   | 109.00     |
| N(1)-C(3)-H(3)    | 109.00     |
| C(2)-C(3)-H(3)    | 109.00     |
| C(4)-C(3)-H(3)    | 109.00     |
| C(4)-C(5)-H(5)    | 120.00     |
| C(6)-C(5)-H(5)    | 120.00     |
| C(5)-C(6)-H(6)    | 120.00     |
| C(7)-C(6)-H(6)    | 120.00     |
| C(6)-C(7)-H(7)    | 120.00     |
| C(8)-C(7)-H(7)    | 120.00     |
| C(7)-C(8)-H(8)    | 120.00     |
| C(9)-C(8)-H(8)    | 120.00     |
| C(4)-C(9)-H(9)    | 120.00     |
| C(8)-C(9)-H(9)    | 120.00     |
| C(10)-C(11)-H(11) | 120.00     |
| C(12)-C(11)-H(11) | 120.00     |
| C(11)-C(12)-H(12) | 120.00     |
| C(13)-C(12)-H(12) | 120.00     |



|                     |        |
|---------------------|--------|
| C(12)-C(13)-H(13)   | 120.00 |
| C(14)-C(13)-H(13)   | 120.00 |
| C(13)-C(14)-H(14)   | 120.00 |
| C(15)-C(14)-H(14)   | 120.00 |
| C(10)-C(15)-H(15)   | 120.00 |
| C(14)-C(15)-H(15)   | 120.00 |
| C(17)-C(18)-H(18)   | 119.00 |
| C(19)-C(18)-H(18)   | 119.00 |
| C(18)-C(19)-H(19)   | 120.00 |
| C(20)-C(19)-H(19)   | 119.00 |
| C(19)-C(20)-H(20)   | 120.00 |
| C(21)-C(20)-H(20)   | 120.00 |
| C(16)-C(21)-H(21)   | 121.00 |
| C(20)-C(21)-H(21)   | 121.00 |
| C(26)-C(27)-H(27A)  | 109.00 |
| C(26)-C(27)-H(27B)  | 110.00 |
| C(26)-C(27)-H(27C)  | 109.00 |
| H(27A)-C(27)-H(27B) | 109.00 |
| H(27A)-C(27)-H(27C) | 110.00 |
| H(27B)-C(27)-H(27C) | 109.00 |
| C(25)-C(28)-H(28A)  | 109.00 |
| C(25)-C(28)-H(28B)  | 109.00 |
| C(25)-C(28)-H(28C)  | 109.00 |
| H(28A)-C(28)-H(28B) | 110.00 |
| H(28A)-C(28)-H(28C) | 110.00 |
| H(28B)-C(28)-H(28C) | 109.00 |
| C(24)-C(29)-H(29A)  | 110.00 |
| C(24)-C(29)-H(29B)  | 109.00 |
| C(24)-C(29)-H(29C)  | 109.00 |
| H(29A)-C(29)-H(29B) | 109.00 |
| H(29A)-C(29)-H(29C) | 109.00 |
| H(29B)-C(29)-H(29C) | 110.00 |
| C(23)-C(30)-H(30A)  | 109.00 |
| C(23)-C(30)-H(30B)  | 109.00 |
| C(23)-C(30)-H(30C)  | 109.00 |
| H(30A)-C(30)-H(30B) | 110.00 |
| H(30A)-C(30)-H(30C) | 109.00 |
| H(30B)-C(30)-H(30C) | 109.00 |
| C(22)-C(31)-H(31A)  | 109.00 |

|                     |        |
|---------------------|--------|
| C(22)-C(31)-H(31B)  | 109.00 |
| C(22)-C(31)-H(31C)  | 109.00 |
| H(31A)-C(31)-H(31B) | 109.00 |
| H(31A)-C(31)-H(31C) | 109.00 |
| H(31B)-C(31)-H(31C) | 109.00 |

---

Table 4. Anisotropic displacement parameters ( $\text{\AA}^2 \times 10^3$ ) for **2**. The anisotropic displacement factor exponent takes the form:  $-2\pi^2 [ h^2 a^{*2} U^{11} + \dots + 2 h k a^* b^* U^{12} ]$

|       | $U^{11}$ | $U^{22}$ | $U^{33}$ | $U^{23}$ | $U^{13}$ | $U^{12}$ |
|-------|----------|----------|----------|----------|----------|----------|
| Ir(1) | 12(1)    | 11(1)    | 9(1)     | 1(1)     | 0(1)     | 1(1)     |
| Cl(1) | 15(1)    | 16(1)    | 14(1)    | 0(1)     | 3(1)     | 1(1)     |
| O(1)  | 19(1)    | 17(1)    | 13(1)    | 0(1)     | -4(1)    | 4(1)     |
| N(1)  | 11(1)    | 15(1)    | 9(1)     | 1(1)     | 2(1)     | 0(1)     |
| C(1)  | 12(1)    | 16(1)    | 10(1)    | 2(1)     | 2(1)     | -1(1)    |
| C(2)  | 14(1)    | 16(1)    | 15(1)    | -1(1)    | -2(1)    | 0(1)     |
| C(3)  | 13(1)    | 16(1)    | 8(1)     | -1(1)    | -1(1)    | 1(1)     |
| C(4)  | 12(1)    | 13(1)    | 13(1)    | -1(1)    | -2(1)    | 0(1)     |
| C(5)  | 16(1)    | 20(1)    | 15(1)    | -3(1)    | 1(1)     | 2(1)     |
| C(6)  | 19(1)    | 17(1)    | 20(1)    | -5(1)    | -2(1)    | 2(1)     |
| C(7)  | 21(1)    | 16(1)    | 24(1)    | 3(1)     | -2(1)    | -1(1)    |
| C(8)  | 19(1)    | 23(1)    | 16(1)    | 2(1)     | 3(1)     | -1(1)    |
| C(9)  | 16(1)    | 17(1)    | 12(1)    | -1(1)    | 1(1)     | 2(1)     |
| C(10) | 15(1)    | 17(1)    | 14(1)    | 1(1)     | -4(1)    | 3(1)     |
| C(11) | 19(1)    | 17(1)    | 15(1)    | 0(1)     | -1(1)    | 0(1)     |
| C(12) | 24(1)    | 17(1)    | 14(1)    | -1(1)    | -5(1)    | 2(1)     |
| C(13) | 23(1)    | 30(1)    | 13(1)    | 7(1)     | 0(1)     | 2(1)     |
| C(14) | 22(1)    | 26(1)    | 20(1)    | 7(1)     | 1(1)     | -2(1)    |
| C(15) | 21(1)    | 19(1)    | 17(1)    | 3(1)     | -4(1)    | -3(1)    |
| C(16) | 12(1)    | 17(1)    | 12(1)    | 1(1)     | 2(1)     | 0(1)     |
| C(17) | 12(1)    | 13(1)    | 13(1)    | 1(1)     | 3(1)     | 2(1)     |
| C(18) | 16(1)    | 17(1)    | 11(1)    | 0(1)     | 2(1)     | 3(1)     |
| C(19) | 18(1)    | 15(1)    | 18(1)    | -2(1)    | 4(1)     | 2(1)     |
| C(20) | 16(1)    | 15(1)    | 23(1)    | 2(1)     | 3(1)     | 6(1)     |
| C(21) | 14(1)    | 20(1)    | 15(1)    | 3(1)     | 0(1)     | 2(1)     |
| C(22) | 15(1)    | 18(1)    | 12(1)    | 1(1)     | -5(1)    | 3(1)     |
| C(23) | 17(1)    | 18(1)    | 16(1)    | 5(1)     | -3(1)    | 2(1)     |
| C(24) | 16(1)    | 16(1)    | 18(1)    | 2(1)     | -6(1)    | 5(1)     |
| C(25) | 14(1)    | 19(1)    | 14(1)    | 1(1)     | -4(1)    | 2(1)     |
| C(26) | 14(1)    | 16(1)    | 14(1)    | 3(1)     | -3(1)    | 5(1)     |
| C(27) | 17(1)    | 19(1)    | 25(1)    | 3(1)     | -4(1)    | -3(1)    |
| C(28) | 19(1)    | 31(1)    | 18(1)    | 2(1)     | 3(1)     | 9(1)     |
| C(29) | 26(1)    | 17(1)    | 27(2)    | -4(1)    | -10(1)   | 5(1)     |
| C(30) | 23(1)    | 29(1)    | 21(1)    | 12(1)    | -1(1)    | 1(1)     |

C(31)    28(1)    25(1)    13(1)    -1(1)    -5(1)    7(1)

---

Table 5. Hydrogen coordinates ( $\times 10^4$ ) and isotropic displacement parameters ( $\text{\AA}^2 \times 10^3$ ) for **2**.

|        | x    | y     | z    | U(eq)  |
|--------|------|-------|------|--------|
| H(2)   | 9056 | 1425  | 2808 | 20(8)  |
| H(3)   | 5422 | 1446  | 2624 | 14(6)  |
| H(5)   | 5601 | 3047  | 2908 | 13(6)  |
| H(6)   | 6157 | 4587  | 2644 | 13(7)  |
| H(7)   | 7880 | 4922  | 1822 | 11(7)  |
| H(8)   | 9020 | 3695  | 1266 | 20(8)  |
| H(9)   | 8386 | 2147  | 1506 | 17(7)  |
| H(11)  | 8711 | 2285  | 3704 | 20(8)  |
| H(12)  | 7916 | 2318  | 4692 | 15(7)  |
| H(13)  | 6272 | 1096  | 5093 | 25(9)  |
| H(14)  | 5346 | -118  | 4493 | 25(10) |
| H(15)  | 6042 | -132  | 3494 | 21(8)  |
| H(18)  | 5355 | -1538 | 635  | 18(7)  |
| H(19)  | 6566 | -2949 | 932  | 11(7)  |
| H(20)  | 8279 | -3038 | 1776 | 19(8)  |
| H(21)  | 8847 | -1680 | 2323 | 15(7)  |
| H(27A) | 1996 | -845  | 1396 | 19(10) |
| H(27B) | 2419 | -1143 | 734  | 19(11) |
| H(27C) | 666  | -598  | 880  | 13(10) |
| H(28A) | 1448 | 444   | 1981 | 20(11) |
| H(28B) | 781  | 1468  | 1813 | 28(9)  |
| H(28C) | 2560 | 1341  | 2163 | 25(8)  |
| H(29A) | 4642 | 3118  | 1080 | 26(8)  |
| H(29B) | 3743 | 2767  | 1674 | 26(9)  |
| H(29C) | 2580 | 3116  | 1135 | 21(8)  |
| H(30A) | 4348 | 2340  | -274 | 23(8)  |
| H(30B) | 6020 | 1698  | -186 | 19(10) |
| H(30C) | 5748 | 2602  | 217  | 23(10) |
| H(31A) | 3888 | -688  | -95  | 16(7)  |
| H(31B) | 5116 | 114   | -350 | 21(10) |
| H(31C) | 3076 | 156   | -464 | 18(10) |

Table 6. Torsion angles [°] for **2**.

---

|                         |             |
|-------------------------|-------------|
| Cl(1)-Ir(1)-N(1)-C(1)   | -77.33(15)  |
| Cl(1)-Ir(1)-N(1)-C(3)   | 109.99(19)  |
| C(17)-Ir(1)-N(1)-C(1)   | 7.46(16)    |
| C(17)-Ir(1)-N(1)-C(3)   | -165.2(2)   |
| C(23)-Ir(1)-N(1)-C(1)   | -166.14(16) |
| C(23)-Ir(1)-N(1)-C(3)   | 21.2(2)     |
| C(24)-Ir(1)-N(1)-C(1)   | 168.38(16)  |
| C(24)-Ir(1)-N(1)-C(3)   | -4.3(2)     |
| C(25)-Ir(1)-N(1)-C(1)   | 128.93(16)  |
| C(25)-Ir(1)-N(1)-C(3)   | -43.8(2)    |
| C(26)-Ir(1)-N(1)-C(1)   | 98.35(18)   |
| C(26)-Ir(1)-N(1)-C(3)   | -74.3(2)    |
| Cl(1)-Ir(1)-C(17)-C(16) | 80.31(17)   |
| Cl(1)-Ir(1)-C(17)-C(18) | -97.5(2)    |
| N(1)-Ir(1)-C(17)-C(16)  | -7.46(17)   |
| N(1)-Ir(1)-C(17)-C(18)  | 174.7(2)    |
| C(22)-Ir(1)-C(17)-C(16) | -177.21(17) |
| C(22)-Ir(1)-C(17)-C(18) | 5.0(2)      |
| C(23)-Ir(1)-C(17)-C(16) | 164.94(16)  |
| C(23)-Ir(1)-C(17)-C(18) | -12.9(3)    |
| C(25)-Ir(1)-C(17)-C(16) | -105.15(19) |
| C(25)-Ir(1)-C(17)-C(18) | 77.0(2)     |
| C(26)-Ir(1)-C(17)-C(16) | -138.10(18) |
| C(26)-Ir(1)-C(17)-C(18) | 44.1(2)     |
| Cl(1)-Ir(1)-C(22)-C(23) | -75.38(13)  |
| Cl(1)-Ir(1)-C(22)-C(26) | 169.49(12)  |
| Cl(1)-Ir(1)-C(22)-C(31) | 47.4(2)     |
| C(17)-Ir(1)-C(22)-C(23) | -163.75(13) |
| C(17)-Ir(1)-C(22)-C(26) | 81.12(15)   |
| C(17)-Ir(1)-C(22)-C(31) | -41.0(2)    |
| C(23)-Ir(1)-C(22)-C(26) | -115.1(2)   |
| C(23)-Ir(1)-C(22)-C(31) | 122.8(3)    |
| C(24)-Ir(1)-C(22)-C(23) | 35.15(13)   |
| C(24)-Ir(1)-C(22)-C(26) | -79.98(15)  |
| C(24)-Ir(1)-C(22)-C(31) | 157.9(3)    |
| C(25)-Ir(1)-C(22)-C(23) | 77.64(14)   |
| C(25)-Ir(1)-C(22)-C(26) | -37.49(14)  |

|                         |             |
|-------------------------|-------------|
| C(25)-Ir(1)-C(22)-C(31) | -159.6(3)   |
| C(26)-Ir(1)-C(22)-C(23) | 115.1(2)    |
| C(26)-Ir(1)-C(22)-C(31) | -122.1(3)   |
| Cl(1)-Ir(1)-C(23)-C(22) | 109.83(12)  |
| Cl(1)-Ir(1)-C(23)-C(24) | -130.45(13) |
| Cl(1)-Ir(1)-C(23)-C(30) | -7.6(2)     |
| N(1)-Ir(1)-C(23)-C(22)  | -163.37(12) |
| N(1)-Ir(1)-C(23)-C(24)  | -43.65(18)  |
| N(1)-Ir(1)-C(23)-C(30)  | 79.2(2)     |
| C(17)-Ir(1)-C(23)-C(22) | 27.6(2)     |
| C(17)-Ir(1)-C(23)-C(24) | 147.28(16)  |
| C(17)-Ir(1)-C(23)-C(30) | -89.9(2)    |
| C(22)-Ir(1)-C(23)-C(24) | 119.72(19)  |
| C(22)-Ir(1)-C(23)-C(30) | -117.4(3)   |
| C(24)-Ir(1)-C(23)-C(22) | -119.72(19) |
| C(24)-Ir(1)-C(23)-C(30) | 122.9(3)    |
| C(25)-Ir(1)-C(23)-C(22) | -82.84(14)  |
| C(25)-Ir(1)-C(23)-C(24) | 36.88(14)   |
| C(25)-Ir(1)-C(23)-C(30) | 159.7(2)    |
| C(26)-Ir(1)-C(23)-C(22) | -39.38(13)  |
| C(26)-Ir(1)-C(23)-C(24) | 80.34(15)   |
| C(26)-Ir(1)-C(23)-C(30) | -156.8(2)   |
| Cl(1)-Ir(1)-C(24)-C(23) | 56.51(14)   |
| Cl(1)-Ir(1)-C(24)-C(25) | 176.36(12)  |
| Cl(1)-Ir(1)-C(24)-C(29) | -65.7(2)    |
| N(1)-Ir(1)-C(24)-C(23)  | 150.53(13)  |
| N(1)-Ir(1)-C(24)-C(25)  | -89.62(14)  |
| N(1)-Ir(1)-C(24)-C(29)  | 28.4(3)     |
| C(22)-Ir(1)-C(24)-C(23) | -37.39(14)  |
| C(22)-Ir(1)-C(24)-C(25) | 82.46(15)   |
| C(22)-Ir(1)-C(24)-C(29) | -159.6(3)   |
| C(23)-Ir(1)-C(24)-C(25) | 119.9(2)    |
| C(23)-Ir(1)-C(24)-C(29) | -122.2(3)   |
| C(25)-Ir(1)-C(24)-C(23) | -119.9(2)   |
| C(25)-Ir(1)-C(24)-C(29) | 118.0(3)    |
| C(26)-Ir(1)-C(24)-C(23) | -81.16(15)  |
| C(26)-Ir(1)-C(24)-C(25) | 38.69(14)   |
| C(26)-Ir(1)-C(24)-C(29) | 156.7(3)    |
| Cl(1)-Ir(1)-C(25)-C(24) | -7.2(2)     |

|                         |             |
|-------------------------|-------------|
| Cl(1)-Ir(1)-C(25)-C(26) | 109.23(17)  |
| Cl(1)-Ir(1)-C(25)-C(28) | -128.9(2)   |
| N(1)-Ir(1)-C(25)-C(24)  | 101.11(14)  |
| N(1)-Ir(1)-C(25)-C(26)  | -142.51(14) |
| N(1)-Ir(1)-C(25)-C(28)  | -20.6(2)    |
| C(17)-Ir(1)-C(25)-C(24) | -175.40(13) |
| C(17)-Ir(1)-C(25)-C(26) | -59.02(17)  |
| C(17)-Ir(1)-C(25)-C(28) | 62.9(2)     |
| C(22)-Ir(1)-C(25)-C(24) | -78.60(15)  |
| C(22)-Ir(1)-C(25)-C(26) | 37.79(14)   |
| C(22)-Ir(1)-C(25)-C(28) | 159.7(3)    |
| C(23)-Ir(1)-C(25)-C(24) | -35.28(14)  |
| C(23)-Ir(1)-C(25)-C(26) | 81.11(15)   |
| C(23)-Ir(1)-C(25)-C(28) | -157.0(3)   |
| C(24)-Ir(1)-C(25)-C(26) | 116.4(2)    |
| C(24)-Ir(1)-C(25)-C(28) | -121.8(3)   |
| C(26)-Ir(1)-C(25)-C(24) | -116.4(2)   |
| C(26)-Ir(1)-C(25)-C(28) | 121.9(3)    |
| Cl(1)-Ir(1)-C(26)-C(22) | -16.66(19)  |
| Cl(1)-Ir(1)-C(26)-C(25) | -134.76(12) |
| Cl(1)-Ir(1)-C(26)-C(27) | 105.3(2)    |
| N(1)-Ir(1)-C(26)-C(22)  | 170.32(13)  |
| N(1)-Ir(1)-C(26)-C(25)  | 52.22(18)   |
| N(1)-Ir(1)-C(26)-C(27)  | -67.8(2)    |
| C(17)-Ir(1)-C(26)-C(22) | -108.56(15) |
| C(17)-Ir(1)-C(26)-C(25) | 133.34(14)  |
| C(17)-Ir(1)-C(26)-C(27) | 13.4(2)     |
| C(22)-Ir(1)-C(26)-C(25) | -118.1(2)   |
| C(22)-Ir(1)-C(26)-C(27) | 121.9(3)    |
| C(23)-Ir(1)-C(26)-C(22) | 39.17(14)   |
| C(23)-Ir(1)-C(26)-C(25) | -78.93(15)  |
| C(23)-Ir(1)-C(26)-C(27) | 161.1(2)    |
| C(24)-Ir(1)-C(26)-C(22) | 79.98(15)   |
| C(24)-Ir(1)-C(26)-C(25) | -38.12(14)  |
| C(24)-Ir(1)-C(26)-C(27) | -158.1(2)   |
| C(25)-Ir(1)-C(26)-C(22) | 118.1(2)    |
| C(25)-Ir(1)-C(26)-C(27) | -120.0(3)   |
| C(2)-O(1)-C(1)-N(1)     | -3.8(3)     |
| C(2)-O(1)-C(1)-C(16)    | -178.0(2)   |



|                         |             |
|-------------------------|-------------|
| C(1)-O(1)-C(2)-C(3)     | 11.2(2)     |
| C(1)-O(1)-C(2)-C(10)    | 135.94(19)  |
| Ir(1)-N(1)-C(1)-O(1)    | 179.21(15)  |
| Ir(1)-N(1)-C(1)-C(16)   | -6.4(3)     |
| C(3)-N(1)-C(1)-O(1)     | -6.1(3)     |
| C(3)-N(1)-C(1)-C(16)    | 168.3(2)    |
| Ir(1)-N(1)-C(3)-C(2)    | -174.59(15) |
| Ir(1)-N(1)-C(3)-C(4)    | -51.6(3)    |
| C(1)-N(1)-C(3)-C(2)     | 12.4(2)     |
| C(1)-N(1)-C(3)-C(4)     | 135.4(2)    |
| O(1)-C(1)-C(16)-C(17)   | 174.1(2)    |
| O(1)-C(1)-C(16)-C(21)   | -1.8(4)     |
| N(1)-C(1)-C(16)-C(17)   | 0.0(3)      |
| N(1)-C(1)-C(16)-C(21)   | -175.9(2)   |
| O(1)-C(2)-C(3)-N(1)     | -14.1(2)    |
| O(1)-C(2)-C(3)-C(4)     | -138.95(19) |
| C(10)-C(2)-C(3)-N(1)    | -134.4(2)   |
| C(10)-C(2)-C(3)-C(4)    | 100.8(2)    |
| O(1)-C(2)-C(10)-C(11)   | 145.4(2)    |
| O(1)-C(2)-C(10)-C(15)   | -35.4(3)    |
| C(3)-C(2)-C(10)-C(11)   | -97.1(3)    |
| C(3)-C(2)-C(10)-C(15)   | 82.1(3)     |
| N(1)-C(3)-C(4)-C(5)     | 153.7(2)    |
| N(1)-C(3)-C(4)-C(9)     | -27.5(3)    |
| C(2)-C(3)-C(4)-C(5)     | -89.2(3)    |
| C(2)-C(3)-C(4)-C(9)     | 89.6(3)     |
| C(3)-C(4)-C(5)-C(6)     | 178.9(2)    |
| C(9)-C(4)-C(5)-C(6)     | 0.1(4)      |
| C(3)-C(4)-C(9)-C(8)     | -177.6(2)   |
| C(5)-C(4)-C(9)-C(8)     | 1.2(4)      |
| C(4)-C(5)-C(6)-C(7)     | -0.8(4)     |
| C(5)-C(6)-C(7)-C(8)     | 0.3(4)      |
| C(6)-C(7)-C(8)-C(9)     | 1.0(4)      |
| C(7)-C(8)-C(9)-C(4)     | -1.7(4)     |
| C(2)-C(10)-C(11)-C(12)  | 179.2(2)    |
| C(15)-C(10)-C(11)-C(12) | 0.0(3)      |
| C(2)-C(10)-C(15)-C(14)  | 179.5(2)    |
| C(11)-C(10)-C(15)-C(14) | -1.3(4)     |
| C(10)-C(11)-C(12)-C(13) | 1.3(4)      |

|                         |             |
|-------------------------|-------------|
| C(11)-C(12)-C(13)-C(14) | -1.4(4)     |
| C(12)-C(13)-C(14)-C(15) | 0.1(4)      |
| C(13)-C(14)-C(15)-C(10) | 1.3(4)      |
| C(1)-C(16)-C(17)-Ir(1)  | 6.5(3)      |
| C(1)-C(16)-C(17)-C(18)  | -175.4(2)   |
| C(21)-C(16)-C(17)-Ir(1) | -177.55(19) |
| C(21)-C(16)-C(17)-C(18) | 0.6(4)      |
| C(1)-C(16)-C(21)-C(20)  | 173.5(2)    |
| C(17)-C(16)-C(21)-C(20) | -1.9(4)     |
| Ir(1)-C(17)-C(18)-C(19) | 178.59(18)  |
| C(16)-C(17)-C(18)-C(19) | 0.8(3)      |
| C(17)-C(18)-C(19)-C(20) | -0.7(4)     |
| C(18)-C(19)-C(20)-C(21) | -0.8(4)     |
| C(19)-C(20)-C(21)-C(16) | 2.0(4)      |
| Ir(1)-C(22)-C(23)-C(24) | -61.39(17)  |
| Ir(1)-C(22)-C(23)-C(30) | 118.4(2)    |
| C(26)-C(22)-C(23)-Ir(1) | 63.26(16)   |
| C(26)-C(22)-C(23)-C(24) | 1.9(3)      |
| C(26)-C(22)-C(23)-C(30) | -178.3(2)   |
| C(31)-C(22)-C(23)-Ir(1) | -126.3(3)   |
| C(31)-C(22)-C(23)-C(24) | 172.3(2)    |
| C(31)-C(22)-C(23)-C(30) | -7.9(4)     |
| Ir(1)-C(22)-C(26)-C(25) | 61.32(16)   |
| Ir(1)-C(22)-C(26)-C(27) | -121.8(2)   |
| C(23)-C(22)-C(26)-Ir(1) | -65.25(16)  |
| C(23)-C(22)-C(26)-C(25) | -3.9(3)     |
| C(23)-C(22)-C(26)-C(27) | 173.0(2)    |
| C(31)-C(22)-C(26)-Ir(1) | 124.5(3)    |
| C(31)-C(22)-C(26)-C(25) | -174.2(2)   |
| C(31)-C(22)-C(26)-C(27) | 2.7(4)      |
| Ir(1)-C(23)-C(24)-C(25) | -57.12(16)  |
| Ir(1)-C(23)-C(24)-C(29) | 127.5(3)    |
| C(22)-C(23)-C(24)-Ir(1) | 58.01(16)   |
| C(22)-C(23)-C(24)-C(25) | 0.9(3)      |
| C(22)-C(23)-C(24)-C(29) | -174.5(2)   |
| C(30)-C(23)-C(24)-Ir(1) | -121.8(3)   |
| C(30)-C(23)-C(24)-C(25) | -178.9(2)   |
| C(30)-C(23)-C(24)-C(29) | 5.7(4)      |
| Ir(1)-C(24)-C(25)-C(26) | -62.48(16)  |

|                         |            |
|-------------------------|------------|
| Ir(1)-C(24)-C(25)-C(28) | 126.8(2)   |
| C(23)-C(24)-C(25)-Ir(1) | 59.13(17)  |
| C(23)-C(24)-C(25)-C(26) | -3.4(3)    |
| C(23)-C(24)-C(25)-C(28) | -174.1(2)  |
| C(29)-C(24)-C(25)-Ir(1) | -125.4(2)  |
| C(29)-C(24)-C(25)-C(26) | 172.1(2)   |
| C(29)-C(24)-C(25)-C(28) | 1.4(4)     |
| Ir(1)-C(25)-C(26)-C(22) | -60.79(16) |
| Ir(1)-C(25)-C(26)-C(27) | 122.2(2)   |
| C(24)-C(25)-C(26)-Ir(1) | 65.31(16)  |
| C(24)-C(25)-C(26)-C(22) | 4.5(3)     |
| C(24)-C(25)-C(26)-C(27) | -172.5(2)  |
| C(28)-C(25)-C(26)-Ir(1) | -124.2(2)  |
| C(28)-C(25)-C(26)-C(22) | 175.0(2)   |
| C(28)-C(25)-C(26)-C(27) | -2.0(4)    |

---

Table 7. Hydrogen bonds for **2** [ $\text{\AA}$  and  $^\circ$ ].

| D-H...A                | d(D-H) | d(H...A) | d(D...A) | $\angle(\text{DHA})$ |
|------------------------|--------|----------|----------|----------------------|
| C(9)-H(9)...Cl(1)      | 0.9500 | 2.6200   | 3.506(3) | 156.00               |
| C(27)-H(27C)...Cl(1)#1 | 0.9800 | 2.7900   | 3.586(2) | 139.00               |

Symmetry transformations used to generate equivalent atoms:

#1  $x-1, y, z$

#### 4. References

- [1] K. Schwekendiek, F. Glorius, *Synthesis*, 2006, **18**, 2996-3002.
- [2] M. Ishihara, H. Togo, *Tetrahedron*, 2007, **63**, 1474-1480
- [3] D.L. Davies, O. Al-Duaij, J. Fawcett, M. Giardiello, S. T. Hilton, D.R. Russell, *Dalton trans*, 2003, 4132-4138
- [4] L. Li, W. W. Brennessel, W.D. Jones, *Organometallics* 2009, **28**, 3492-3500
- [5] Y. Boutadla, D. L. Davies, R. C. Jones, K. Singh, *Chem. Eur. J.* 2011, **17**, 3438-3448
- [6] V. Dragisich, W.D. Wulff, K. Hogsteen, *Organometallics*, 1990, **9**, 2867-2870
- [7] J. Clayden, J. Clayton; R. A. Harvey, O. Karlubikova, *Synlett*, 2009, **17**, 2836-2838
- [8] B. Villa-Marcos, *Chiral Amines via Asymmetric Reduction of Imino Bonds*, University of Liverpool, 2011, PhD
- [9] C. Wang, A. Pettman, J. Basca, J. Xiao, *Angew. Chem. Int. Ed.* 2010, **49**, 7548-7552
- [10] Q. Lei, Y. Wei, D. Talwar, C. Wang, D. Xue, J. Xiao, *Chem. Eur. J.* 2013, **19**, 4021-4029
- [11] C. Li, B. Villa-Marcos and J. Xiao, *J. Am. Chem. Soc.*, 2009, **131**, 6967-6969.
- [12] C. Denhez, J. L. Vasse and J. Szymoniak, *Synthesis.*, 2005, **2**, 2075-2079.
- [13] H. Hikawa, K. Izumi, Y. Ino, S. Kikkawa, Y. Yokoyama and I. Azumaya, *Adv. Synth. Catal.*, 2015, **357**, 1037-1048
- [14] S. Zhu, J. Xie, Y. Zhang, S. Li and Q. Zhou, *J. Am. Chem. Soc.*, 2006, **128**, 12886-12891.
- [15] A. J. Minnaard, B. L. Feringa and J. G. De Vries, *J. Am. Chem. Soc.*, 2009, **131**, 8358-8359.
- [16] S. Y. Shirai, H. Nara, Y. Kayaki and T. Ikariya, *Organometallics*, 2009, **28**, 802-809.
- [17] C. Wang, X. Wu, L. Zhou and J. Sun, *Chem. Eur. J.*, 2008, **14**, 8789-8792.
- [18] A. Bedard, A. Adamo, K.C. Aroh, M.G. Russell, A.A. Bedermann, J. Torosian, B. Yue, K.F. Jensen, T.F. Jamison, *Science*, 2018, **361**(6408), 1220-1225.
- [19] M. Chang, Y. Huang, S. Liu, Y. Chen, S. W. Krska, I. W. Davies and X. Zhang, *Angew. Chem. Int. Ed.*, 2014, **53**, 12761-12764.
- [20] S.E. Denmark, A.J. Cresswell, *J. Org. Chem.* 2013, **78**, 12593-12628
- [21] J. Romero-Ibanez, S. Cruz-Gregorio, J. Sandoval-Lira, J. M. Hernandez-Perez, L. Quintero, F. Sartillo-Piscil, *Angew. Chem. Int. Ed.* 2019, **58**(26), 8867-8871
